# Supplementary material for: Kinematics and morphological correlates of descent strategies in arboreal mammals suggest early upright postures in euprimates
Source: eLife. 2026 Feb 17;14:RP108268. doi: 10.7554/eLife.108268 (PMC12912726; doi:10.7554/eLife.108268)
Supplement: Source data 1. [file elife-108268-data1.xlsx]

## Sheet: Kinematics
Species	indiv	Substrat_diameter	substrat_orientation	asct_desct	LH_touchdown1	LH_lift-off 1	LH_touchdown2	RF_touchdown1	RF_lift-off 1	RF_touchdown2	RH_touchdown1	RH_lift-off 1	RH_touchdown2	LF_touchdown1	LF_lift-off 1	LF_touchdown2	Speed
Typhlomys chapensis	male1	S	V	asct	4095	4128	4140	4104	4131	4147	4116	4152	4161	4127	4149	4162	0.383956
Typhlomys chapensis	male1	S	V	asct	4401	4431	4443	4410	4437	4450	4419	4453	4464	4429	4451	4476
Typhlomys chapensis	male1	S	V	asct	989	1031	1041	1002	1033	1055	1012	1057	1065	1032	1065	1078	0.43752
Typhlomys chapensis	male1	S	V	asct	1107	1143	1155	1115	1151	1166	1132	1169	1179	1139	1172	1190
Typhlomys chapensis	male2	S	V	desct-head	199	259	276	202	269	290	245	290	310	255	312	330	0.134441
Typhlomys chapensis	male2	S	V	desct-head	34407	34457	34472	34412	34482	34502	34452	34502	34517	34457	34527	34547
Typhlomys chapensis	male2	S	V	desct-head	199	259	276	202	269	290	245	290	310	255	312	330
Typhlomys chapensis	male1	L	V	asct	1990	1996	2001	1995	2001	2005	1990	1996	2001	1995	2001	2005	0.802695
Typhlomys chapensis	male1	L	V	asct	2011	2018	2022	2016	2022	2029	2011	2018	2022	2016	2022	2029
Typhlomys chapensis	male1	L	V	desct-head	1895	1900	1904	1899	1905	1909	1895	1900	1904	1899	1905	1909	0.6
Typhlomys chapensis	male1	L	V	desct-head	556	568	574	568	583	588	556	568	574	566	583	588	0.350415
Typhlomys chapensis	male2	L	V	asct	7486	7497	7500	7492	7507	7516	7486	7497	7500	7492	7507	7513	0.672268
Typhlomys chapensis	male1	L	V	asct	1136	1145	1150	1149	1156	1159	1136	1145	1150	1149	1154	1159	0.582319
Typhlomys chapensis	male1	L	V	asct	1164	1172	1176	1169	1177	1181	1164	1172	1176	1169	1177	1181
Typhlomys chapensis	male2	L	V	asct	1189	1198	1202	1195	1203	1206	1189	1198	1202	1194	1200	1206
Typhlomys chapensis	male2	L	V	asct	1217	1230	1233	1223	1234	1240	1217	1230	1233	1223	1232	1240
Typhlomys chapensis	male2	L	V	desct-head	2711	2715	2719	2716	2720	2723	2711	2715	2719	2716	2720	2723	0.6
Typhlomys chapensis	male2	L	V	desct-head	2726	2732	2736	2731	2737	2740	2726	2732	2736	2732	2737	2741
Typhlomys chapensis	male1	L	V	desct-head	2309	2314	2319	2315	2320	2324	2309	2314	2319	2315	2321	2325	0.7
Typhlomys chapensis	male1	L	V	desct-head	3707	3722	3730	3722	3739	3746	3707	3722	3730	3721	3739	3746
Graphiurus murinus	male	M	V	desct-head	2850	2863	2865	2853	2864	2866	2858	2870	2874	2861	2876	2880	0.144182
Graphiurus murinus	male	M	V	asct	6087	6093	6095	6089	6093	6097	6091	6097	6100	6093	6097	6101	0.430503
Graphiurus murinus	male	M	V	desct-head	8456	8463	8465	8458	8464	8467	8461	8467	8470	8463	8468	8471	0.400052
Graphiurus murinus	female	M	V	asct	0	0	0	0	0	0	0	0	0	0	0	0	0.184393
Graphiurus murinus	female	M	V	desct-head	1705	1711	1714	1707	1710	1714	1709	1715	1717	1710	1715	1718	0.38625
Graphiurus murinus	female	M	V	asct	3715	3725	3727	3716	3726	3728	3711	3716	3718	3713	3717	3719	0.114732
Graphiurus murinus	female	M	V	desct-head	3175	3178	3180	3175	3178	3180	3178	3180	3182	3178	3180	3182	0.254292
Graphiurus murinus	female	M	V	asct	820	822	825	821	823	825	822	826	828	823	826	828
Graphiurus murinus	male	M	V	asct	1602	1610	1613	1606	1612	1615	1609	1616	1618	1611	1616	1619	0.395314
Graphiurus murinus	male	M	V	asct	1622	1628	1630	1623	1628	1631	1626	1632	1636	1627	1632	1637
Graphiurus murinus	male	L	V	desct-head	1886	1894	1896	1886	1895	1897	1894	1898	1900	1894	1898	1900	0.244228
Graphiurus murinus	female	L	V	desct-head	1901	1906	1908	1901	1906	1908	1905	1909	1911	1905	1909	1911
Graphiurus murinus	male	L	V	desct-head	1886	1894	1896	1886	1895	1897	1894	1898	1900	1894	1898	1900
Graphiurus murinus	female	L	V	asct	4610	4614	4617	4614	4618	4621	4610	4614	4617	4614	4618	4621	0.398391
Graphiurus murinus	male	L	V	asct	5000	5004	5007	5004	5008	5011	5000	5004	5007	5004	5008	5011
Graphiurus murinus	female	L	V	asct	4610	4614	4617	4614	4618	4621	4610	4614	4617	4614	4618	4621
Caluromys philander	male1	M	V	asct	192	204	211	192	207	213	201	208	214	202	209	215	0.254865
Caluromys philander	male1	M	V	desct-head	2511	2522	2531	2510	2524	2529	2520	2532	2541	2519	2537	2539	0.376749
Caluromys philander	male1	M	V	asct	955	970	974	960	975	978	968	978	985	967	983	988
Caluromys philander	male1	M	V	desct-head	4806	4819	4830	4805	4821	4828	4817	4828	4834	4816	4830	4832	0.349394
Caluromys philander	male1	M	V	desct-head	7587	7603	7616	7586	7607	7614	7602	7617	7630	7601	7621	7628
Caluromys philander	male1	M	V	asct	1068	1077	1080	1069	1078	1081	1073	1081	1085	1074	1082	1086	0.718732
Caluromys philander	male1	L	V	asct	18643	18646	18653	18641	18645	18651	18648	18651	18658	18646	18650	18656	0.380961
Caluromys philander	male1	L	V	asct	18664	18673	18682	18663	18672	18680	18671	18682	18692	18670	18681	18691
Caluromys philander	male1	L	V	asct	18753	18770	18775	18752	18769	18774	18763	18779	18785	18762	18778	18784
Caluromys philander	male1	L	V	desct-head	19319	19335	19343	19324	19342	19347	19331	19348	19357	19334	19358	19362	0.258146
Caluromys philander	male1	L	V	desct-head	19374	19390	19397	19376	19393	19398	19383	19401	19407	19387	19405	19410
Caluromys philander	male1	L	V	desct-head	35589	35604	35610	35590	35608	35611	35602	35613	35624	35603	35619	35625
Caluromys philander	male1	L	V	asct	0	0	0	0	0	0	0	0	0	0	0	0	0.432686
Caluromys philander	male1	L	V	desct-head	0	0	0	0	0	0	0	0	0	0	0	0	0.524895
Caluromys philander	male1	S	V	asct	56043	56054	56061	56043	56055	56061	56050	56063	56069	56051	56064	56070	0.253898
Caluromys philander	male1	S	V	asct	56515	56526	56533	56515	56527	56533	56524	56537	56543	56524	56537	56543	0.343485
Caluromys philander	male1	S	V	asct	56552	56563	56568	56552	56563	56568	56560	56571	56575	56560	56571	56575
Caluromys philander	male2	S	V	desct-head	0	0	0	0	0	0	0	0	0	0	0	0	0.104639
Caluromys philander	male2	S	O	desct-head	11875	11892	11897	11880	11897	11902	11887	11902	11907	11892	11907	11909
Caluromys philander	male2	M	O	desct-head	12314	12326	12329	12316	12326	12329	12322	12331	12335	12324	12331	12335	0.149424
Caluromys philander	male2	S	O	asct	12511	12528	12533	12514	12529	12536	12523	12537	12543	12526	12542	12546	0.32016
Caluromys philander	male2	M	O	desct-head	13350	13357	13361	13350	13358	13362	13355	13364	13368	13355	13365	13369	0.541763
Caluromys philander	male2	M	O	desct-head	13373	13380	13384	13373	13382	13384	13379	13386	13390	13379	13387	13390
Caluromys philander	male2	M	O	desct-head	13396	13402	13407	13396	13404	13407	13401	13408	13412	13401	13409	13412
Caluromys philander	male2	S	O	desct-head	16225	16231	16236	16225	16233	16236	16229	16236	16241	16229	16238	16241	0.459467
Caluromys philander	male2	M	O	asct	16321	16328	16335	16320	16329	16334	16328	16336	16342	16327	16337	16341	0.435505
Caluromys philander	male2	S	O	asct	17386	17396	17400	17387	17396	17402	17394	17403	17406	17394	17405	17409	0.325383
Caluromys philander	male2	L	O	asct	4701	4716	4720	4704	4722	4726	4710	4727	4732	4714	4733	4738	0.199985
Caluromys philander	male2	L	O	asct	4749	4768	4777	4753	4772	4780	4761	4782	4794	4766	4790	4799
Caluromys philander	male2	L	O	asct	12520	12540	12548	12524	12545	12550	12536	12551	12558	12539	12554	12559	0.258688
Caluromys philander	male2	S	V	desct-head	16026	16041	16044	16030	16041	16046	16034	16046	16049	16038	16046	16050	0.135583
Caluromys philander	male2	M	O	asct	17041	17054	17061	17043	17055	17060	17050	17063	17070	17052	17063	17069	0.23796
Caluromys philander	male2	S	O	desct-head	18180	18196	18201	18185	18198	18203	18189	18204	18211	18194	18207	18213	0.214463
Caluromys philander	male2	L	O	asct	18403	18411	18416	18402	18410	18415	18408	18416	18423	18410	18417	18424	0.376158
Caluromys philander	male2	M	O	asct	5580	5603	5613	5582	5608	5616	5598	5617	5627	5601	5623	5631	0.140555
Caluromys philander	male2	S	V	desct-head	7806	7818	7823	7807	7820	7824	7817	7824	7828	7818	7824	7827	0.435881
Caluromys philander	male2	S	O	asct	9224	9233	9243	9224	9235	9244	9232	9246	9251	9232	9246	9251
Caluromys philander	male2	M	O	asct	11375	11389	11397	11375	11389	11397	11386	11402	11409	11386	11402	11409
Caluromys philander	male2	S	V	desct-head	11809	11816	11822	11809	11818	11822	11815	11824	11829	11815	11826	11829	0.427882
Caluromys philander	male2	S	O	asct	12528	12534	12539	12527	12531	12538	12533	12540	12544	12532	12538	12543	0.583123
Caluromys philander	male2	S	O	desct-head	15584	15590	15595	15585	15592	15595	15589	15595	15600	15589	15596	15600	0.500302
Caluromys philander	male1	L	O	desct-head	26822	26834	26839	26823	26839	26843	26829	26844	26849	26830	26842	26850	0.130679
Caluromys philander	male1	L	O	desct-head	27197	27205	27210	27199	27207	27210	27205	27213	27218	27204	27215	27219
Caluromys philander	male1	L	O	desct-head	26822	26834	26839	26823	26839	26843	26829	26844	26849	26830	26842	26850
Dryomys nitedula	male	L	O	asct	942	944	947	943	946	949	942	944	947	943	946	949	0.61303
Dryomys nitedula	male	L	O	desct-head	2961	2963	2964	2962	2965	2967	2961	2963	2964	2962	2965	2967	0.209969
Dryomys nitedula	male	L	O	desct-head	2975	2977	2980	2977	2981	2983	2975	2977	2980	2977	2981	2983
Dryomys nitedula	male	L	O	asct	4209	4212	4215	4212	4214	4218	4209	4212	4215	4212	4214	4218	0.321625
Dryomys nitedula	male	L	O	asct	4224	4229	4231	4228	4232	4234	4224	4229	4231	4228	4232	4234
Dryomys nitedula	male	L	O	desct-head	4519	4522	4523	4520	4524	4527	4519	4522	4523	4520	4524	4527	0.442874
Dryomys nitedula	male	L	O	desct-head	4500	4505	4506	4503	4507	4509	4500	4505	4506	4503	4507	4509
Dryomys nitedula	male	L	O	asct	5104	5107	5109	5106	5109	5112	5104	5107	5109	5106	5109	5112	0.791841
Dryomys nitedula	male	M	O	asct	2330	2333	2336	2334	2337	2340	2330	2333	2336	2334	2337	2340	0.651536
Dryomys nitedula	male	M	O	asct	17812	17817	17819	17816	17820	17824	17812	17817	17819	17816	17820	17824	0.325493
Dryomys nitedula	male	M	O	asct	17827	17832	17834	17832	17835	17839	17827	17832	17834	17832	17835	17839
Dryomys nitedula	female	M	O	desct-head	18356	18361	18363	18359	18364	18369	18356	18361	18363	18359	18364	18369	0.251205
Dryomys nitedula	female	M	O	desct-head	18356	18361	18363	18359	18364	18369	18356	18361	18363	18359	18364	18369
Dryomys nitedula	female	M	O	desct-head	18356	18361	18363	18359	18364	18369	18356	18361	18363	18359	18364	18369
Dryomys nitedula	male	S	O	asct	33763	33781	33786	33776	33786	33791	33771	33793	33796	33780	33797	33802	0.0884471
Dryomys nitedula	male	S	O	asct	4858	4866	4870	4862	4871	4876	4864	4872	4876	4866	4875	4880	0.0724352
Dryomys nitedula	male	S	O	asct	4858	4866	4870	4862	4871	4876	4864	4872	4876	4866	4875	4880
Dryomys nitedula	male	S	O	desct-head	797	833	836	813	838	842	820	843	846	832	867	870	0.0129417
Dryomys nitedula	male	S	O	desct-head	14	41	45	19	59	61	23	62	65	31	68	71	0.021471
Dryomys nitedula	male	S	O	desct-head	45	73	76	61	80	83	65	90	95	71	97	100
Dryomys nitedula	male	L	V	desct-head	8364	8366	8368	8365	8368	8370	8364	8366	8368	8365	8368	8370	0.396195
Dryomys nitedula	male	L	V	desct-head	8541	8546	8549	8546	8549	8551	8541	8546	8549	8546	8549	8551
Dryomys nitedula	male	L	V	asct	9199	9203	9205	9202	9205	9208	9199	9203	9205	9202	9205	9208	0.482719
Dryomys nitedula	male	L	V	asct	14314	14323	14325	14318	14325	14328	14314	14323	14325	14318	14325	14328	0.279272
Dryomys nitedula	male	L	V	asct	14325	14331	14332	14328	14334	14336	14325	14331	14332	14328	14334	14336
Dryomys nitedula	female	L	V	asct	13695	13701	13703	13696	13703	13706	13695	13701	13703	13696	13703	13706	0.295466
Dryomys nitedula	male	L	V	desct-head	13974	13976	13977	13975	13978	13980	13974	13976	13977	13975	13978	13980	0.44597
Dryomys nitedula	male	M	V	asct	2831	2834	2837	2834	2837	2840	2831	2834	2837	2834	2837	2840	0.382348
Dryomys nitedula	male	M	V	desct-head	8713	8716	8718	8716	8723	8728	8713	8716	8718	8716	8723	8728	0.284975
Dryomys nitedula	male	M	V	asct	9383	9390	9392	9389	9393	9396	9385	9390	9392	9390	9395	9397	0.450685
Dryomys nitedula	female	M	V	asct	16634	16661	16664	16638	16691	16695	16642	16689	16692	16648	16691	16695
Dryomys nitedula	female	M	V	desct-head	9000	9003	9005	9003	9009	9014	9000	9003	9005	9003	9009	9014
Dryomys nitedula	female	S	V	asct	3472	3487	3490	3480	3489	3492	3482	3492	3494	3487	3490	3498	0.106054
Dryomys nitedula	female	S	V	asct	3490	3500	3504	3492	3501	3507	3494	3509	3513	3498	3514	3521
Dryomys nitedula	female	S	V	asct	0	0	0	0	0	0	0	0	0	0	0	0	0.076278
Dryomys nitedula	female	S	V	desct-head	8371	8391	8395	8371	8393	8398	8381	8398	8403	8389	8400	8406	0.0648672
Dryomys nitedula	male	S	V	desct-head	1607	1615	1617	1612	1621	1624	1608	1614	1617	1613	1622	1625	0.166145
Dryomys nitedula	male	S	V	desct-head	1607	1615	1617	1612	1621	1624	1608	1614	1617	1613	1622	1625
Dryomys nitedula	male	S	V	asct	4755	4764	4767	4760	4767	4768	4763	4773	4776	4764	4774	4778
Tupaia belangeri	female2	L	O	desct-head	341	348	353	348	353	358	341	348	353	348	353	358	0.614795
Tupaia belangeri	female2	L	O	desct-head	353	361	366	358	366	369	353	361	366	358	366	369
Tupaia belangeri	female2	L	O	desct-head	3903	3908	3914	3908	3914	3919	3904	3908	3914	3908	3914	3919	0.737833
Tupaia belangeri	female2	L	O	desct-head	3914	3921	3923	3919	3923	3929	3914	3921	3923	3919	3923	3929
Tupaia belangeri	female2	L	O	desct-head	1069	1073	1080	1073	1078	1081	1069	1073	1080	1073	1078	1081	0.949937
Tupaia belangeri	female1	L	O	asct	1922	1933	1942	1931	1940	1951	1922	1933	1942	1931	1940	1951	0.343643
Tupaia belangeri	female1	L	O	asct	694	703	713	701	713	724	694	703	713	701	713	724	0.205541
Tupaia belangeri	female1	L	O	asct	694	703	713	701	713	724	694	703	713	701	713	724
Tupaia belangeri	female2	M	O	desct-head	276	283	289	280	287	295	272	279	286	283	289	295	0.370016
Tupaia belangeri	female2	M	O	desct-head	2961	2970	2974	2960	2968	2973	2966	2974	2981	2971	2979	2983	0.5899
Tupaia belangeri	female2	M	O	desct-head	10202	10212	10217	10211	10216	10222	10202	10209	10214	10209	10220	10227	0.463332
Tupaia belangeri	female2	M	O	desct-head	10217	10226	10231	10222	10231	10235	10214	10221	10227	10227	10253	10262
Tupaia belangeri	female3	M	O	asct	1436	1444	1449	1443	1454	1458	1439	1446	1451	1443	1450	1458	0.217819
Tupaia belangeri	female3	M	O	asct	1449	1460	1464	1458	1485	1489	1451	1461	1465	1458	1501	1509
Tupaia belangeri	female3	M	O	asct	1406	1432	1439	1407	1432	1439	1427	1472	1475	1434	1482	1489	0.12546
Tupaia belangeri	female3	M	O	asct	1520	1534	1542	1529	1556	1563	1520	1528	1534	1529	1560	1568
Tupaia belangeri	female3	M	O	asct	2247	2255	2261	2250	2258	2265	2244	2251	2257	2255	2266	2276	0.406942
Tupaia belangeri	female2	L	V	desct-head	1230	1240	1259	1239	1245	1261	1230	1240	1259	1239	1245	1261	0.671452
Tupaia belangeri	female2	L	V	desct-head	5556	5561	5571	5559	5565	5570	5556	5561	5571	5559	5565	5570	0.543982
Tupaia belangeri	female2	L	V	asct	168	174	186	172	176	190	168	174	186	172	176	190	0.324505
Tupaia belangeri	female2	L	V	desct-head	2375	2387	2404	2386	2391	2406	2375	2387	2404	2386	2391	2406	0.607767
Tupaia belangeri	female3	L	V	asct	560	571	581	569	580	587	560	572	579	569	580	590	0.590116
Tupaia belangeri	female3	L	V	asct	581	603	611	587	605	618	579	603	611	590	605	618
Tupaia belangeri	female1	M	V	desct-head	2336	2341	2344	2340	2345	2351	2336	2342	2345	2340	2345	2351	0.5
Tupaia belangeri	female1	M	V	asct	760	774	781	768	786	794	764	780	785	772	786	792	0.4
Tupaia belangeri	female1	M	V	asct	781	791	796	794	812	820	785	800	805	792	807	812
Tupaia belangeri	female1	M	V	desct-head	11205	11229	11237	11205	11233	11235	11203	11227	11234	11205	11232	11234
Trichosurus vulpecula	female	L	O	desct-head	85	117	132	83	119	131	65	91	107	75	96	114	0.259309
Trichosurus vulpecula	female	L	O	asct	574	627	653	571	641	659	611	665	692	611	675	690	0.242008
Trichosurus vulpecula	male	L	O	desct-head	124	227	245	180	261	270	198	279	304	228	319	330	0.131416
Trichosurus vulpecula	male	L	O	desct-head	245	332	356	270	363	373	304	378	392	330	395	429
Trichosurus vulpecula	female	L	O	desct-head	21	61	85	21	69	85	54	103	119	54	104	119	0.221748
Trichosurus vulpecula	male	L	O	asct	1808	1817	1826	1808	1815	1826	1817	1825	1835	1816	1827	1835	0.681863
Trichosurus vulpecula	male	L	O	asct	1826	1837	1849	1826	1837	1849	1835	1853	1867	1835	1853	1867
Trichosurus vulpecula	male	L	O	asct	1849	1870	1880	1849	1870	1880	1867	1884	1889	1867	1885	1900
Trichosurus vulpecula	female	M	O	asct	2169	2209	2229	2178	2219	2234	2204	2236	2261	2205	2251	2262	0.218151
Trichosurus vulpecula	female	M	O	asct	2229	2265	2284	2234	2275	2290	2261	2291	2305	2262	2297	2314
Trichosurus vulpecula	male	M	O	asct	15	62	78	26	73	86	48	93	112	60	98	120	0.121216
Trichosurus vulpecula	male	M	O	asct	78	123	140	86	133	146	112	154	170	120	157	175
Trichosurus vulpecula	male	M	O	asct	255	299	308	263	307	317	285	321	343	294	331	332
Trichosurus vulpecula	male	M	O	desct-head	3201	3259	3275	3215	3265	3281	3235	3287	3295	3255	3292	3305	0.140727
Trichosurus vulpecula	male	M	O	desct-head	3275	3315	3329	3281	3329	3339	3295	3349	3359	3305	3364	3374
Trichosurus vulpecula	female	M	O	desct-head	3441	3529	3543	3461	3547	3559	3488	3563	3577	3523	3579	3595	0.155289
Trichosurus vulpecula	female	M	O	desct-head	3543	3601	3611	3559	3619	3629	3577	3633	3647	3595	3645	3657
Trichosurus vulpecula	female	M	O	desct-head	3611	3659	3672	3629	3675	3687	3647	3691	3707	3657	3697	3711
Trichosurus vulpecula	female	S	O	asct	729	777	795	730	795	803	769	803	820	770	813	823	0.294986
Trichosurus vulpecula	male	S	O	asct	4601	4649	4666	4602	4654	4666	4638	4667	4689	4643	4673	4689	0.183363
Trichosurus vulpecula	female	S	O	desct-head	37	71	85	38	71	85	61	95	111	61	106	117	0.264318
Trichosurus vulpecula	female	S	O	desct-head	37	71	85	38	71	85	61	95	111	61	106	117
Trichosurus vulpecula	female	S	O	desct-head	37	71	85	38	71	85	61	95	111	61	106	117
Trichosurus vulpecula	male	L	V	asct	35	57	61	41	61	69	35	57	61	41	61	69	0.453766
Trichosurus vulpecula	male	L	V	asct	61	83	87	69	87	95	61	83	87	69	87	95
Trichosurus vulpecula	female	L	V	asct	47	65	69	52	69	75	47	65	69	52	69	75	0.66512
Trichosurus vulpecula	female	L	V	asct	69	88	92	75	92	98	69	88	92	75	92	98
Trichosurus vulpecula	female	L	V	desct-head	848	865	869	852	870	876	860	867	870	860	871	876	0.210768
Trichosurus vulpecula	female	L	V	desct-head	869	893	899	876	899	905	870	895	900	876	900	906
Trichosurus vulpecula	male	M	V	asct	563	600	613	592	613	630	576	631	645	597	650	669	0.26032
Trichosurus vulpecula	female	M	V	asct	481	519	541	489	533	543	505	547	559	517	561	573	0.266593
Trichosurus vulpecula	female	M	V	desct-head	5279	5372	5383	5298	5390	5399	5316	5408	5417	5355	5424	5435	0.127555
Trichosurus vulpecula	male	S	V	asct	65	109	130	76	117	136	96	137	160	107	150	168	0.352744
Trichosurus vulpecula	female	S	V	desct-head	7933	8048	8063	7984	8107	8117	8001	8159	8170	8047	8200	8223	0.103047
Petaurus breviceps	1	L	O	asct	6006	6023	6027	6005	6025	6032	6010	6039	6045	6015	6045	6050	0.274978
Petaurus breviceps	2	L	O	asct	6027	6058	6063	6032	6067	6071	6045	6058	6063	6050	6067	6071	0.338376
Petaurus breviceps	1	L	O	desct-head	225	237	242	230	235	245	233	247	253	236	250	255	0.238841
Petaurus breviceps	2	L	O	desct-head	242	255	260	245	255	259	253	263	267	255	264	267
Petaurus breviceps	3	L	O	asct	4016	4034	4039	4017	4036	4042	4021	4034	4039	4022	4035	4042	1.56229
Petaurus breviceps	3	L	O	desct-head	473	487	491	476	489	492	482	497	503	484	501	505	0.0490339
Petaurus breviceps	4	L	O	desct-head	491	508	513	492	507	514	503	526	529	505	526	531
Petaurus breviceps	4	L	O	asct	247	267	272	252	273	275	247	285	292	250	276	284
Petaurus breviceps	1	M	O	asct	5323	5335	5343	5323	5335	5343	5333	5343	5349	5332	5343	5349	0.400056
Petaurus breviceps	3	M	O	desct-head	6217	6242	6252	6217	6242	6252	6207	6227	6242	6206	6227	6242
Petaurus breviceps	2	M	O	asct	5227	5235	5240	5225	5233	5239	5235	5241	5245	5233	5240	5245	0.512519
Petaurus breviceps	1	M	O	desct-head	2465	2478	2485	2463	2478	2485	2475	2487	2498	2477	2488	2499	0.139505
Petaurus breviceps	3	M	O	asct	805	820	826	805	820	824	810	827	835	811	827	832	0.315884
Petaurus breviceps	4	M	O	asct	826	835	844	824	836	841	835	843	851	832	844	849
Petaurus breviceps	2	M	O	desct-head	1167	1179	1182	1167	1179	1183	1177	1193	1195	1178	1193	1195	0.314658
Petaurus breviceps	1	S	O	asct	243	283	293	244	289	296	274	299	313	281	307	315	0.119089
Petaurus breviceps	4	S	O	desct-head	1352	1385	1447	1353	1383	1403	1369	1458	1471	1376	1461	1473
Petaurus breviceps	2	S	O	asct	2176	2251	2273	2173	2235	2257	2194	2275	2293	2198	2305	2311	0.0216671
Petaurus breviceps	3	S	O	desct-head	3049	3073	3079	3040	3073	3079	3066	3085	3093	3068	3086	3094	0.116583
Petaurus breviceps	3	S	O	asct	195	215	219	195	215	219	209	224	255	205	223	233	0.116724
Petaurus breviceps	1	S	O	desct-head	532	558	561	536	560	565	542	565	573	545	571	577	0.11635
Petaurus breviceps	4	S	O	asct	601	626	639	604	631	640	621	647	667	620	671	677	0.0514217
Petaurus breviceps	2	S	O	desct-head	1734	1762	1777	1740	1767	1776	1752	1783	1807	1755	1791	1801	0.118762
Petaurus breviceps	1	L	V	asct	2067	2120	2125	2079	2128	2144	2103	2146	2160	2115	2172	2179	0.0748623
Petaurus breviceps	2	L	V	asct	1361	1413	1436	1373	1454	1465	1394	1469	1478	1410	1481	1492	0.0592319
Petaurus breviceps	3	L	V	asct	1436	1494	1512	1465	1516	1525	1478	1528	1543	1492	1546	1555
Petaurus breviceps	4	L	V	desct-head	3601	3685	3713	3644	3717	3723	3658	3734	3742	3665	3747	3751	0.0274456
Petaurus breviceps	3	L	V	desct-head	325	369	373	331	373	379	333	361	367	339	367	370	0.1351
Petaurus breviceps	1	L	V	desct-head	757	791	799	765	799	802	779	809	813	785	819	823
Petaurus breviceps	2	L	V	desct-head	629	663	677	641	679	681	649	684	687	655	692	696	0.0720733
Petaurus breviceps	1	M	V	asct	1827	1855	1871	1827	1861	1872	1850	1880	1896	1851	1886	1897	0.111962
Petaurus breviceps	2	M	V	asct	1473	1485	1497	1477	1487	1493	1483	1501	1507	1479	1507	1513	0.183213
Petaurus breviceps	3	M	V	asct	8713	8745	8751	8720	8749	8753	8735	8754	8761	8739	8759	8763	0.284905
Petaurus breviceps	3	M	V	desct-head	4636	4659	4665	4644	4663	4671	4654	4671	4676	4657	4677	4682	0.174038
Petaurus breviceps	2	M	V	desct-head	343	371	381	357	375	383	370	385	397	369	393	399	0.105818
Petaurus breviceps	1	M	V	desct-head	381	403	419	383	415	421	397	423	435	399	433	437
Petaurus breviceps	1	S	V	asct	793	813	821	803	814	820	809	822	834	809	822	831	0.29212
Petaurus breviceps	2	S	V	asct	3607	3657	3663	3611	3667	3673	3633	3675	3682	3659	3683	3691	0.0905208
Petaurus breviceps	3	S	V	asct	3663	3689	3695	3673	3698	3705	3682	3705	3713	3691	3711	3717
Petaurus breviceps	4	S	V	asct	3695	3717	3722	3705	3723	3727	3713	3727	3735	3717	3737	3742
Petaurus breviceps	4	S	V	desct-head	5317	5339	5343	5313	5353	5360	5327	5356	5362	5335	5367	5375	0.190477
Petaurus breviceps	2	S	V	desct-head	4609	4625	4646	4606	4623	4637	4620	4647	4653	4619	4657	4663
Petaurus breviceps	1	S	V	desct-head	4646	4658	4661	4637	4677	4683	4653	4673	4679	4663	4685	4690
Petaurus breviceps	3	S	V	desct-head	143	163	169	141	159	167	125	143	149	136	150	157	0.206167
Petaurus breviceps	2	S	V	desct-head	169	185	196	167	181	200	149	169	173	157	175	179
Petaurus breviceps	1	S	V	desct-head	0	0	0	0	0	0	0	0	0	0	0	0	0.310396
Potos flavus	female	L	O	asct	3353	3383	3397	3352	3380	3395	3376	3399	3416	3371	3401	3414	0.486866
Potos flavus	female	L	O	asct	1281	1307	1325	1279	1298	1317	1300	1324	1336	1295	1323	1334	0.574309
Potos flavus	female	L	O	asct	1325	1337	1351	1317	1335	1348	1336	1351	1364	1334	1349	1361
Potos flavus	female	L	O	desct-head	2430	2484	2503	2442	2499	2509	2477	2517	2533	2479	2526	2545	0.286075
Potos flavus	female	L	O	desct-head	317	335	348	320	336	353	332	349	370	334	354	373	0.939515
Potos flavus	female	L	O	desct-head	643	669	684	654	677	687	667	690	707	669	693	707	0.320024
Potos flavus	female	M	O	asct	17	36	58	15	36	48	36	57	71	31	57	69	0.670204
Potos flavus	female	M	O	desct-head	149	177	190	155	177	191	169	197	207	172	197	209	0.408992
Potos flavus	female	M	O	asct	1486	1508	1527	1488	1508	1519	1507	1525	1536	1505	1524	1533	0.932226
Potos flavus	female	M	O	desct-head	6230	6260	6279	6231	6260	6281	6249	6285	6305	6249	6291	6307	0.433796
Potos flavus	female	M	O	asct	371	388	410	361	386	406	388	413	435	383	412	430	0.32882
Potos flavus	female	M	O	desct-head	1573	1606	1617	1577	1605	1619	1595	1625	1638	1597	1624	1641	0.245626
Potos flavus	female	S	O	asct	3785	3801	3822	3780	3801	3818	3805	3825	3846	3799	3825	3842	0.478326
Potos flavus	female	S	O	asct	1573	1602	1624	1570	1602	1621	1599	1626	1658	1595	1625	1655	0.365045
Potos flavus	female	S	O	desct-head	1904	1937	1942	1910	1937	1945	1917	1972	1995	1931	1972	2000	0.375494
Potos flavus	female	S	O	asct	1335	1356	1370	1330	1356	1368	1353	1379	1395	1348	1380	1392	0.569766
Potos flavus	female	S	O	desct-head	1513	1532	1549	1516	1532	1553	1523	1556	1565	1527	1556	1569	0.513565
Potos flavus	female	S	O	asct	1040	1061	1075	1037	1061	1070	1057	1078	1091	1050	1078	1087	0.782767
Potos flavus	female	S	O	desct-head	1145	1168	1177	1148	1168	1180	1161	1182	1195	1164	1182	1197	0.872432
Potos flavus	female	L	V	asct	1012	1062	1078	1040	1101	1123	1015	1062	1078	1037	1090	1100	0.305289
Potos flavus	female	L	V	asct	1330	1362	1372	1355	1381	1394	1337	1405	1433	1355	1440	1452	0.188519
Potos flavus	female	L	V	desct-head	1377	1420	1428	1416	1442	1455	1388	1425	1435	1410	1440	1450	0.383663
Potos flavus	female	L	V	desct-head	718	777	792	732	787	799	720	805	821	730	790	804	0.310908
Potos flavus	female	L	V	desct-head	220	271	281	246	309	326	228	265	275	248	319	327	0.198216
Potos flavus	female	L	V	asct	1100	1129	1136	1119	1151	1164	1103	1137	1144	1121	1168	1177	0.858514
Potos flavus	female	M	V	asct	487	541	550	531	560	574	503	549	555	527	560	578	0.356881
Potos flavus	female	M	V	asct	2753	2773	2785	2750	2773	2783	2763	2786	2798	2761	2786	2797	0.769109
Potos flavus	female	M	V	asct	2753	2773	2785	2750	2773	2783	2763	2786	2798	2761	2786	2797
Potos flavus	female	M	V	desct-head	2307	2382	2400	2330	2452	2470	2245	2367	2378	2324	2405	2439	0.537016
Potos flavus	female	M	V	desct-head	3161	3199	3210	3187	3221	3236	3155	3187	3197	3187	3221	3237	0.349488
Potos flavus	female	M	V	desct-head	391	441	449	422	464	478	383	431	441	428	464	480	0.181621
Potos flavus	female	S	V	desct-head	1980	2003	2016	2000	2030	2060	1995	2019	2028	2000	2030	2061	0.157921
Potos flavus	female	S	V	asct	303	367	380	331	385	406	287	341	357	333	385	407	0.277558
Potos flavus	female	S	V	desct-head	1980	2003	2016	2000	2030	2060	1995	2019	2028	2000	2030	2061
Potos flavus	female	S	V	asct	303	367	380	331	385	406	287	341	357	333	385	407
Potos flavus	female	S	V	desct-head	1980	2003	2016	2000	2030	2060	1995	2019	2028	2000	2030	2061
Potos flavus	female	S	V	asct	303	367	380	331	385	406	287	341	357	333	385	407
Nasua nasua	female1	L	V	asct	85	163	177	101	148	153	86	163	177	101	148	153	0.272286
Nasua nasua	male1	L	V	asct	54	76	81	60	82	91	54	76	81	60	82	91	0.296857
Nasua nasua	male1	L	V	asct	81	108	118	91	115	124	81	108	118	91	115	124
Nasua nasua	male1	L	V	asct	118	139	146	124	144	153	118	139	149	124	153	168
Nasua nasua	female2	L	V	asct	134	168	174	143	189	198	139	176	186	151	198	206	0.188637
Nasua nasua	female2	L	V	asct	174	211	226	198	239	245	186	215	228	206	247	253
Nasua nasua	male2	L	V	desct-head	0	47	60	27	63	71	0	38	47	33	68	72	0.307122
Nasua nasua	male2	L	V	desct-head	60	98	109	71	117	134	47	86	92	72	117	134
Nasua nasua	female1	L	V	desct-head	0	0	0	0	0	0	0	0	0	0	0	0	0.154106
Nasua nasua	female1	L	V	desct-head	603	718	736	657	744	751	611	702	716	656	744	756	0.138041
Nasua nasua	female1	L	V	desct-head	736	810	823	751	834	856	716	791	809	756	834	842
Nasua nasua	female1	L	V	desct-head	823	871	881	856	944	960	809	883	895	842	950	975
Nasua nasua	male2	L	O	asct	782	813	830	790	821	833	757	788	809	770	802	815	0.429234
Nasua nasua	male2	L	O	asct	830	867	880	833	872	883	809	840	854	815	849	869
Nasua nasua	female1	L	O	asct	1514	1545	1556	1517	1554	1565	1498	1518	1535	1499	1527	1540	0.275223
Nasua nasua	female2	L	O	asct	725	753	770	737	766	777	748	777	789	756	782	798	0.363579
Nasua nasua	female2	L	O	asct	770	796	809	777	805	818	789	817	828	798	826	839
Nasua nasua	male1	L	O	desct-head	603	623	632	605	632	648	615	645	654	622	653	664	0.265254
Nasua nasua	male1	L	O	desct-head	760	788	798	768	788	809	782	807	821	784	809	822
Nasua nasua	female1	L	O	desct-head	3066	3097	3108	3076	3113	3121	3086	3121	3127	3097	3127	3146	0.260105
Nasua nasua	male1	M	O	asct	1748	1778	1788	1749	1781	1801	1771	1792	1821	1772	1815	1829	0.224736
Nasua nasua	male1	M	O	desct-head	2127	2154	2163	2135	2163	2173	2149	2172	2183	2155	2182	2199	0.364666
Nasua nasua	male2	M	O	asct	17	48	62	23	55	67	31	68	85	43	76	93	0.359704
Nasua nasua	male2	M	O	desct-head	1931	1956	1966	1917	1979	1989	1948	2001	2015	1950	2020	2032	0.164764
Nasua nasua	female1	M	O	asct	368	411	421	375	415	428	387	430	446	403	442	460	0.208971
Nasua nasua	female1	M	O	desct-head	1365	1393	1399	1375	1440	1448	1352	1401	1414	1382	1417	1431	0.256917
Nasua nasua	female2	M	O	asct	228	240	255	243	264	275	228	242	255	232	254	263	0.52821
Nasua nasua	female2	M	O	desct-head	860	881	895	860	906	920	878	920	927	880	932	945	0.286825
Nasua nasua	male1	S	O	asct	5401	5484	5494	5429	5525	5542	5457	5520	5548	5479	5642	5655	0.16402
Nasua nasua	male1	S	O	asct	5494	5660	5670	5542	5679	5694	5548	5679	5687	5655	5762	5776	0.163723
Nasua nasua	male1	S	O	asct	5494	5660	5670	5542	5679	5694	5548	5679	5687	5655	5762	5776
Nasua nasua	female2	S	O	desct-head	1152	1197	1210	1165	1222	1236	1163	1176	1192	1179	1237	1249	0.194194
Nasua nasua	female2	S	O	desct-head	1210	1264	1275	1236	1282	1293	1192	1250	1259	1249	1291	1301
Nasua nasua	female2	S	O	desct-head	1275	1308	1321	1293	1312	1331	1259	1295	1302	1301	1369	1377
Procyon lotor	female	L	V	asct	2712	2771	2782	2726	2785	2792	2687	2732	2743	2706	2746	2757	0.243685
Procyon lotor	male2	L	V	asct	4806	4876	4886	4835	4903	4913	4853	4927	4939	4866	4898	4903	0.131339
Procyon lotor	female	L	V	desct-head	9968	10032	10036	10014	10088	10100	9956	10024	10036	9995	10057	10066	0.324849
Procyon lotor	male3	L	V	asct	3445	3480	3489	3462	3511	3518	3442	3488	3497	3461	3515	3519	0.131086
Procyon lotor	male3	L	V	asct	3489	3533	3544	3518	3568	3573	3497	3545	3551	3519	3569	3573
Procyon lotor	male1	L	V	asct	608	686	696	628	707	715	566	640	648	596	657	667	0.0912862
Procyon lotor	female	L	V	desct-rump	8842	8873	8879	8859	8913	8918	8851	8901	8907	8843	8886	8895	0.263084
Procyon lotor	male1	L	V	desct-rump	338	428	435	323	397	403	309	367	376	357	417	454	0.100406
Procyon lotor	male2	L	V	desct-head	1861	1927	1941	1915	1968	1976	1885	1917	1927	1913	1930	1941	0.136722
Procyon lotor	male3	L	V	desct-head	1845	1924	1929	1857	1993	1999	1882	2000	2013	1920	2016	2029	0.163799
Procyon lotor	male1	L	O	asct	695	703	713	686	723	730	695	736	746	679	757	767	0.190813
Procyon lotor	female	L	O	asct	877	910	920	888	923	931	897	935	945	906	952	960	0.346805
Procyon lotor	female	L	O	asct	920	963	971	931	971	979	945	982	993	960	994	1001
Procyon lotor	male2	L	O	asct	222	258	266	232	269	277	248	298	308	251	320	329	0.214864
Procyon lotor	male3	L	O	asct	160	197	206	167	203	211	174	216	221	190	223	231	0.361909
Procyon lotor	male3	L	O	desct-head	1964	1990	1996	1990	2019	2024	1946	2002	2010	1978	2014	2017	0.19428
Procyon lotor	male2	L	O	desct-head	330	355	365	339	367	377	348	373	382	358	384	393	0.41213
Procyon lotor	female	L	O	desct-head	270	317	333	276	377	386	253	282	289	272	339	353	0.211072
Procyon lotor	male1	L	O	desct-head	299	396	410	351	417	422	285	376	388	374	430	437	0.107336
Procyon lotor	male1	L	O	desct-head	508	579	585	527	593	602	483	547	562	544	593	603
Procyon lotor	male2	M	V	asct	4651	4744	4757	4687	4786	4793	4674	4719	4740	4710	4764	4769	0.175389
Procyon lotor	male3	M	V	asct	0	0	0	0	0	0	0	0	0	0	0	0	0.0964199
Procyon lotor	male1	M	V	asct	4106	4175	4187	4150	4219	4226	4056	4157	4169	4100	4235	4240
Procyon lotor	male1	M	V	desct-rump	5109	5159	5171	5083	5187	5198	5141	5180	5189	5090	5205	5212
Procyon lotor	female	M	V	asct	48	102	112	63	120	126	14	67	78	36	91	97	0.164428
Procyon lotor	female	M	V	desct-rump	3930	3984	3994	3970	4051	4060	3942	4021	4029	3970	4040	4069	0.152427
Procyon lotor	male2	M	V	desct-rump	291	321	339	279	340	346	310	362	367	325	399	411	0.13216
Procyon lotor	male3	M	O	asct	11	109	116	43	121	128	84	138	150	105	159	164	0.200025
Procyon lotor	male3	M	O	desct-rump	369	389	400	378	420	429	369	389	400	386	401	410	0.145108
Procyon lotor	male1	M	O	asct	0	28	35	4	35	40	6	55	61	26	70	75	0.264598
Procyon lotor	male1	M	O	asct	35	102	107	40	115	119	61	132	143	75	147	152
Procyon lotor	female	M	O	desct-head	63	140	149	79	175	183	91	184	195	104	198	208	0.360296
Procyon lotor	male2	M	O	desct-head	3153	3197	3204	3172	3202	3213	3132	3175	3183	3150	3183	3188	0.502515
Procyon lotor	male2	M	O	desct-head	3204	3227	3232	3213	3234	3239	3183	3218	3223	3188	3222	3227
Nycticebus pygmaeus	1	L	V	asct	0	0	0	0	0	0	0	0	0	0	0	0	0.137877
Nycticebus pygmaeus	1	M	O	desct-head	112	135	155	113	138	152	132	160	172	130	165	180	0.395128
Nycticebus pygmaeus	2	L	O	desct-head	193	243	254	194	245	255	220	285	309	220	286	310	0.172213
Nycticebus pygmaeus	2	S	O	asct	195	225	240	194	235	245	213	263	271	225	261	270	0.0851464
Nycticebus pygmaeus	3	L	V	desct-head	8666	8702	8713	8665	8704	8713	8685	8715	8728	8687	8715	8729	0.123553
Nycticebus pygmaeus	1	S	O	asct	9139	9164	9172	9138	9166	9171	9155	9176	9184	9156	9178	9185	0.237698
Nycticebus pygmaeus	2	L	V	asct	15501	15578	15588	15497	15580	15585	15465	15545	15566	15463	15560	15571	0.062926
Nycticebus pygmaeus	4	L	V	asct	20173	20196	20204	20174	20196	20203	20187	20209	20222	20193	20208	20222	0.185852
Nycticebus pygmaeus	1	M	V	asct	3153	3377	3442	3120	3377	3448	3260	3504	3547	3266	3503	3548	0.106897
Nycticebus pygmaeus	2	M	V	desct-head	7358	7433	7467	7361	7436	7474	7388	7512	7546	7390	7550	7597	0.176157
Nycticebus pygmaeus	3	M	O	asct	27938	28279	28424	27988	28256	28406	27873	28034	28181	27884	28016	28168	0.0158026
Nycticebus pygmaeus	4	L	O	desct-head	596	705	738	620	760	784	656	802	825	691	823	847	0.0849117
Nycticebus pygmaeus	1	L	O	desct-head	1048	1139	1158	1070	1145	1166	1086	1168	1188	1119	1175	1194	0.0801464
Nycticebus pygmaeus	2	L	O	asct	4528	4558	4567	4535	4557	4569	4548	4588	4603	4553	4587	4607	0.0930494
Nycticebus pygmaeus	4	L	V	asct	8100	8136	8149	8102	8139	8148	8116	8155	8167	8118	8152	8166	0.0651049
Nycticebus pygmaeus	1	M	V	asct	44	58	66	43	57	65	52	70	81	54	70	83	0.395078
Nycticebus pygmaeus	4	M	V	desct-head	1823	1842	1848	1836	1853	1865	1841	1868	1878	1852	1879	1884	0.12945
Nycticebus pygmaeus	3	L	V	desct-head	2010	2038	2053	2012	2083	2098	2034	2123	2134	2038	2192	2201	0.0809423
Nycticebus pygmaeus	2	L	O	asct	2490	2502	2508	2489	2502	2509	2498	2515	2522	2498	2515	2522	0.192082
Nycticebus pygmaeus	3	L	O	asct	2508	2526	2532	2509	2525	2532	2522	2535	2542	2522	2534	2542
Nycticebus pygmaeus	4	L	O	desct-head	114	129	138	115	129	138	125	143	152	126	143	152	0.542729
Nycticebus pygmaeus	1	L	O	asct	156	166	175	155	165	176	164	180	188	163	179	186	0.362516
Nycticebus pygmaeus	2	M	O	desct-head	609	628	641	612	634	643	619	650	654	622	645	657	0.190612
Nycticebus pygmaeus	3	L	V	asct	1723	1758	1776	1728	1780	1791	1751	1799	1810	1749	1803	1813	0.0946883
Nycticebus pygmaeus	4	M	V	asct	2000	2027	2034	2002	2024	2034	2023	2039	2049	2018	2036	2048	0.484122
Nycticebus pygmaeus	1	M	V	desct-head	12	145	162	32	154	173	77	184	197	126	188	204	0.0635156
Nycticebus pygmaeus	4	L	V	desct-head	720	775	795	731	785	810	656	734	755	668	744	769	0.0655914
Nycticebus pygmaeus	2	M	O	asct	194	206	216	193	204	213	204	218	224	203	216	223	0.328032
Nycticebus pygmaeus	4	L	V	desct-head	362	386	392	366	395	409	372	404	413	376	420	435	0.109363
Nycticebus pygmaeus	4	M	O	asct	711	761	788	712	758	778	743	817	838	742	811	832	0.0849821
Nycticebus pygmaeus	1	M	O	asct	788	864	904	778	859	880	838	912	948	832	906	940
Nycticebus pygmaeus	2	M	O	desct-head	1716	1726	1751	1713	1729	1738	1727	1762	1791	1724	1764	1786	0.189502
Nycticebus pygmaeus	4	S	O	desct-head	60	70	74	58	69	74	68	75	81	67	76	81	0.858013
Nycticebus pygmaeus	3	M	O	desct-head	81	86	91	80	85	90	85	91	95	85	90	94	1.09493
Nycticebus pygmaeus	4	S	V	asct	129	142	159	126	137	151	138	153	166	134	151	163	0.261072
Nycticebus pygmaeus	1	S	O	desct-head	645	654	658	642	653	658	636	647	651	638	646	652	0.557012
Nycticebus pygmaeus	4	S	V	desct-head	145	159	166	143	153	164	134	145	153	132	143	151	0.610619
Nycticebus pygmaeus	3	M	V	desct-head	3180	3281	3301	3175	3273	3295	3237	3364	3395	3235	3360	3390	0.0237614
Nycticebus pygmaeus	1	S	V	asct	4055	4112	4151	4051	4108	4147	4090	4180	4196	4088	4174	4192	0.130953
Nycticebus pygmaeus	2	S	V	desct-head	519	533	539	525	533	541	533	542	546	532	540	547	0.600143
Nycticebus pygmaeus	3	M	V	asct	1404	1433	1440	1408	1435	1450	1420	1454	1460	1424	1455	1463	0.185841
Nycticebus pygmaeus	4	S	V	asct	4055	4112	4151	4051	4108	4147	4090	4180	4196	4088	4174	4192
Nycticebus pygmaeus	1	S	V	desct-head	4183	4593	4665	4340	4598	4683	4423	4794	4857	4580	4799	4878	0.0185875
Nycticebus pygmaeus	4	S	V	desct-head	148	166	172	149	165	172	163	173	180	163	174	179	0.237228
Nycticebus pygmaeus	2	S	V	asct	1167	1197	1209	1168	1197	1208	1192	1212	1224	1193	1212	1223	0.139932
Nycticebus pygmaeus	3	S	O	asct	176	198	204	180	196	206	191	209	217	194	207	218	0.220451
Nycticebus pygmaeus	3	S	O	desct-head	249	258	264	246	256	263	257	265	272	255	263	271	0.439327
Nycticebus pygmaeus	1	S	O	asct	313	321	327	308	319	326	319	329	336	318	326	333	0.523089
Nycticebus pygmaeus	1	S	O	desct-head	756	779	781	761	773	778	768	780	788	771	782	787	0.426921
Callicebus cupreus	male	M	O	desct-head	707	731	743	704	730	743	681	714	727	680	710	725	0.476264
Callicebus cupreus	male	M	O	asct	1578	1601	1610	1576	1598	1610	1561	1582	1598	1560	1579	1594	0.62806
Callicebus cupreus	male	M	O	asct	82	106	125	80	105	124	103	136	155	100	135	153	0.326056
Callicebus cupreus	male	M	O	desct-head	437	461	477	435	461	476	408	443	458	409	440	454	0.390742
Callicebus cupreus	male	M	O	desct-head	812	832	848	811	835	846	796	817	829	792	813	826	0.605192
Callicebus cupreus	male	M	O	asct	1226	1250	1267	1225	1247	1264	1245	1274	1290	1241	1273	1288	0.347508
Callicebus cupreus	male	M	O	asct	356	379	391	354	378	391	374	398	407	372	396	405	0.387848
Callicebus cupreus	male	M	O	desct-head	266	296	311	263	293	309	290	315	331	288	312	329	0.444565
Callicebus cupreus	female	M	O	desct-head	31	57	71	34	58	69	51	76	90	53	76	90	0.369699
Callicebus cupreus	female	M	O	asct	411	436	452	410	435	449	432	455	471	430	454	470	0.615883
Callicebus cupreus	female	M	O	desct-head	115	132	148	112	131	145	100	118	131	97	115	128	0.846485
Callicebus cupreus	female	M	O	asct	818	843	860	814	840	858	798	822	837	795	818	835	0.560908
Callicebus cupreus	female	M	O	asct	486	507	519	484	505	516	503	523	537	501	521	535	0.479545
Callicebus cupreus	female	M	O	desct-head	6	25	38	2	23	36	21	42	60	19	42	59	0.726142
Callicebus cupreus	male	L	V	desct-side	1127	1152	1171	1146	1178	1191	1130	1162	1175	1142	1182	1187	0.235699
Callicebus cupreus	male	L	O	desct-head	1513	1544	1553	1531	1579	1585	1517	1533	1541	1530	1573	1584	0.367559
Callicebus cupreus	male	L	O	desct-side	1553	1595	1600	1585	1603	1616	1541	1590	1597	1584	1601	1616
Callicebus cupreus	female	L	O	desct-head	58	76	84	78	99	108	52	84	93	79	93	100	0.395745
Callicebus cupreus	female	L	O	asct	568	576	590	577	589	602	571	574	588	576	583	591	1.10739
Callicebus cupreus	female	L	O	desct-head	18	32	65	34	55	62	15	42	49	33	66	82	0.46913
Callicebus cupreus	female	L	O	desct-head	63	77	85	79	96	106	60	85	93	80	94	100	0.285652
Callicebus cupreus	female	M	V	asct	853	877	889	854	878	892	834	860	873	837	861	874	0.630654
Callicebus cupreus	female	L	O	desct-head	6040	6069	6079	6039	6070	6082	6059	6089	6101	6058	6091	6107	0.374773
Callicebus cupreus	female	L	O	asct	6571	6591	6603	6570	6594	6603	6554	6577	6586	6550	6575	6586	0.440371
Callicebus cupreus	male	L	O	desct-head	7405	7434	7450	7404	7437	7450	7388	7412	7425	7387	7411	7424	0.29547
Callicebus cupreus	male	L	O	asct	7852	7909	7923	7858	7914	7924	7832	7889	7905	7833	7891	7904	0.351659
Callicebus cupreus	male	L	O	asct	7923	7945	7961	7924	7946	7962	7905	7929	7942	7904	7929	7940
Callicebus cupreus	male	L	O	desct-head	8797	8832	8847	8801	8833	8846	8825	8854	8867	8824	8855	8872	0.42836
Callicebus cupreus	female	L	O	asct	9330	9376	9395	9333	9381	9396	9304	9338	9372	9306	9341	9366	0.228552
Callicebus cupreus	male	L	O	asct	711	730	746	707	728	743	729	748	770	724	746	767	0.70078
Callicebus cupreus	male	L	V	desct-side	3644	3677	3685	3676	3694	3712	3632	3682	3687	3667	3691	3710	0.457333
Callicebus cupreus	male	L	V	asct	4704	4720	4734	4701	4722	4731	4693	4708	4720	4688	4704	4713	0.532005
Callicebus cupreus	female	L	V	asct	1140	1179	1194	1148	1191	1198	1139	1165	1176	1157	1198	1208	0.194867
Callicebus cupreus	female	L	V	desct-side	1589	1631	1641	1620	1648	1656	1600	1634	1640	1622	1643	1659	0.26441
Callicebus cupreus	male	L	V	asct	1953	2001	2011	1984	2029	2040	1973	2016	2025	1996	2046	2052	0.110797
Callicebus cupreus	male	L	V	asct	1715	1742	1753	1730	1792	1798	1718	1758	1765	1738	1804	1811	0.1047
Callicebus cupreus	male	L	V	desct-rump	805	864	868	840	880	897	808	857	864	836	874	903
Callicebus cupreus	male	L	V	desct-head	1678	1689	1695	1688	1696	1709	1678	1691	1697	1688	1696	1709	0.502063
Callicebus cupreus	female	L	V	desct-side	1663	1714	1721	1688	1726	1743	1650	1707	1723	1685	1729	1739	0.125013
Callicebus cupreus	female	L	V	asct	1934	1944	1955	1940	1951	1962	1932	1945	1951	1941	1955	1962	0.593177
Callicebus cupreus	male	M	V	desct-side	173	284	303	191	311	319	178	290	301	193	308	324	0.270416
Callicebus cupreus	male	M	V	asct	793	825	828	816	841	857	814	836	843	840	863	879	0.280941
Callicebus cupreus	female	M	V	desct-side	458	501	523	486	528	550	458	504	524	487	528	548	0.304195
Callicebus cupreus	female	M	V	asct	1237	1265	1274	1220	1247	1256	1219	1241	1251	1242	1258	1269	0.288731
Callicebus cupreus	female	M	V	desct-side	672	692	707	688	726	747	673	708	720	693	726	750	0.301296
Callicebus cupreus	female	M	V	asct	1022	1047	1058	1029	1051	1061	1005	1038	1045	1008	1035	1045	0.394965
Callicebus cupreus	male	M	V	desct-side	452	483	490	464	492	510	451	470	482	474	497	508	0.292488
Callicebus cupreus	male	M	V	asct	2417	2444	2456	2412	2440	2452	2437	2464	2477	2428	2460	2472	0.426994
Callicebus cupreus	male	M	V	asct	2456	2482	2496	2452	2480	2493	2477	2502	2523	2472	2500	2515
Callicebus cupreus	male	M	V	desct-head	999	1025	1033	1009	1033	1054	997	1013	1043	1016	1037	1048	0.340172
Callicebus cupreus	female	M	V	desct-side	713	784	792	768	802	818	691	773	789	760	796	816	0.492749
Callicebus cupreus	male	M	V	desct-side	2531	2567	2592	2553	2597	2609	2528	2568	2592	2556	2599	2612	0.231325
Callicebus cupreus	male	M	V	asct	3364	3382	3403	3362	3387	3398	3357	3371	3380	3354	3364	3376	0.353498
Callicebus cupreus	female	M	V	desct-head	618	663	683	662	692	698	631	703	715	663	687	702	0.499479
Callicebus cupreus	female	M	V	asct	1064	1085	1099	1058	1085	1098	1048	1064	1081	1046	1063	1080	0.613061
Callicebus cupreus	male	S	V	desct-side	943	989	1005	957	1014	1034	946	994	1002	954	1013	1035	0.257364
Callicebus cupreus	male	S	V	asct	1785	1818	1834	1785	1821	1834	1815	1838	1854	1815	1841	1852	0.314203
Callicebus cupreus	female	S	V	desct-side	572	633	649	604	660	680	573	642	651	599	659	676	0.174874
Callicebus cupreus	female	S	V	asct	966	991	1003	963	990	1002	986	1009	1023	984	1009	1021	0.499167
Callicebus cupreus	male	S	V	desct-side	914	993	1018	951	1024	1040	898	987	1015	954	1028	1043	0.362769
Callicebus cupreus	male	S	V	asct	1134	1161	1173	1133	1159	1169	1156	1175	1190	1154	1175	1187	0.43751
Callicebus cupreus	female	S	V	desct-side	24	81	100	62	108	130	15	84	100	60	107	136	0.319349
Callicebus cupreus	female	S	V	asct	788	802	815	785	802	813	773	791	800	771	789	798	0.858279
Callicebus cupreus	female	S	V	desct-side	171	249	270	206	283	307	178	243	272	210	287	302	0.211632
Callicebus cupreus	female	S	V	desct-side	777	848	872	830	885	908	779	869	877	810	884	905
Callicebus cupreus	female	S	V	asct	1040	1060	1074	1039	1064	1073	1021	1044	1056	1020	1047	1055	0.387084
Callicebus cupreus	female	S	V	asct	1074	1099	1112	1073	1100	1112	1056	1079	1093	1055	1080	1093
Callicebus cupreus	male	S	V	desct-side	59	115	129	98	145	163	62	116	130	97	143	162	0.192297
Callicebus cupreus	male	S	V	asct	301	327	342	300	328	341	317	357	377	316	359	376	0.437414
Callicebus cupreus	female	S	O	desct-head	11	37	53	11	37	50	31	57	72	29	56	71	0.474706
Callicebus cupreus	female	S	O	asct	1381	1411	1426	1380	1411	1425	1402	1431	1454	1401	1430	1451	0.469027
Callicebus cupreus	female	S	O	desct-head	1251	1286	1306	1255	1286	1308	1276	1324	1337	1276	1316	1335	0.234412
Callicebus cupreus	female	S	O	asct	369	403	418	374	400	416	396	424	441	395	425	436	0.518379
Callicebus cupreus	female	S	O	desct-head	1401	1441	1453	1403	1439	1454	1434	1466	1485	1430	1470	1482	0.300568
Callicebus cupreus	female	S	O	asct	117	153	175	115	153	172	80	125	143	76	128	140	0.291589
Callicebus cupreus	female	S	O	asct	58	88	101	55	87	100	37	65	78	34	63	76	0.684407
Callicebus cupreus	female	S	O	desct-head	1277	1299	1310	1274	1298	1310	1259	1280	1293	1256	1279	1291	0.386433
Callicebus cupreus	male	S	O	asct	19	45	58	14	43	56	39	64	80	37	65	78	0.785972
Callicebus cupreus	male	S	O	desct-head	15	31	42	23	41	63	10	24	50	30	49	59	0.7832
Callicebus cupreus	male	S	O	desct-head	617	637	657	634	659	678	600	627	641	627	671	684	0.821366
Eulemur mongoz	male1	L	O	desct-head	587	605	621	589	606	622	579	592	602	581	591	603	0.770361
Eulemur mongoz	male1	L	O	asct	931	947	958	929	946	957	946	958	973	944	957	972	0.833784
Eulemur mongoz	male2	L	O	asct	939	954	968	938	955	966	956	969	980	953	967	979	1.13349
Eulemur mongoz	male1	L	O	desct-head	1598	1617	1630	1600	1623	1633	1585	1604	1619	1590	1607	1621	0.773061
Eulemur mongoz	male2	L	O	desct-head	2834	2848	2858	2835	2849	2860	2847	2865	2873	2848	2865	2876	0.652871
Eulemur mongoz	male2	L	O	asct	3178	3193	3208	3177	3193	3207	3170	3180	3190	3169	3179	3191	1.0616
Eulemur mongoz	male2	L	O	asct	437	455	467	440	456	468	454	468	477	452	469	477	0.796638
Eulemur mongoz	male1	L	O	asct	1458	1469	1483	1454	1469	1482	1469	1483	1496	1466	1483	1494	1.01124
Eulemur mongoz	male1	L	O	asct	1967	1988	1998	1966	1988	1996	1953	1970	1983	1951	1970	1982
Eulemur mongoz	male1	L	O	desct-head	766	787	799	767	790	799	747	772	780	753	776	787	0.692008
Eulemur mongoz	male2	L	O	desct-head	957	984	997	958	979	991	976	1003	1014	974	999	1012	0.43797
Eulemur mongoz	male1	L	O	asct	1392	1412	1424	1393	1413	1423	1410	1426	1438	1408	1425	1437	0.697541
Eulemur mongoz	male2	L	O	asct	1443	1458	1469	1440	1458	1468	1431	1445	1460	1426	1440	1454	0.969459
Eulemur mongoz	male1	L	O	desct-head	6226	6243	6253	6232	6250	6260	6212	6231	6240	6220	6239	6249	0.595194
Eulemur mongoz	male2	L	O	desct-head	7080	7101	7109	7077	7096	7108	7064	7085	7096	7066	7083	7094	0.541325
Eulemur mongoz	male1	L	V	desct-side	622	647	665	646	683	694	623	647	660	644	680	692	0.613636
Eulemur mongoz	male1	L	V	asct	1055	1072	1081	1055	1078	1092	1068	1087	1093	1072	1103	1120	0.808106
Eulemur mongoz	male1	L	V	asct	3135	3150	3156	3147	3177	3192	3128	3140	3172	3130	3148	3168	0.471995
Eulemur mongoz	male1	L	V	desct-side	4009	4024	4040	4020	4028	4040	4008	4019	4024	4014	4032	4039	0.501974
Eulemur mongoz	male2	L	V	asct	6143	6184	6198	6147	6184	6202	6178	6214	6223	6176	6214	6222	0.293768
Eulemur mongoz	male2	L	V	desct-rump	6361	6378	6388	6353	6377	6385	6372	6393	6403	6372	6393	6404	0.480125
Eulemur mongoz	male2	L	V	asct	6979	6998	7003	6982	6999	7008	6990	7014	7020	6992	7015	7029	0.333094
Eulemur mongoz	male2	L	V	desct-rump	7322	7348	7353	7328	7356	7370	7297	7325	7332	7312	7337	7353	0.264664
Eulemur mongoz	male1	L	V	asct	8263	8285	8291	8263	8296	8309	8275	8310	8319	8283	8312	8329	0.425071
Eulemur mongoz	male1	L	V	desct-side	8551	8566	8571	8551	8568	8577	8550	8583	8597	8563	8585	8597	0.349358
Eulemur mongoz	male2	L	V	asct	9451	9490	9495	9454	9487	9507	9478	9511	9520	9480	9516	9534	0.325159
Eulemur mongoz	male2	M	O	asct	942	961	977	940	961	975	962	979	993	957	979	992	0.718521
Eulemur mongoz	male2	M	O	desct-head	2154	2178	2187	2149	2175	2187	2136	2158	2167	2135	2157	2169	0.504829
Eulemur mongoz	male2	M	O	asct	2759	2776	2790	2757	2776	2788	2744	2761	2775	2742	2761	2774	0.748833
Eulemur mongoz	male1	M	O	desct-head	3202	3216	3224	3198	3216	3226	3184	3204	3214	3183	3200	3212	0.992588
Eulemur mongoz	male2	M	O	desct-head	3317	3352	3361	3315	3352	3361	3330	3336	3347	3332	3335	3346	0.605838
Eulemur mongoz	male1	M	O	asct	1365	1386	1395	1371	1393	1411	1350	1369	1381	1353	1375	1387	0.694296
Eulemur mongoz	male1	M	O	desct-head	1746	1775	1787	1749	1775	1782	1734	1752	1769	1730	1753	1771	0.530653
Eulemur mongoz	male1	M	O	asct	1872	1886	1897	1869	1886	1898	1884	1900	1914	1882	1899	1912	1.03975
Eulemur mongoz	male1	M	O	desct-head	2157	2172	2184	2154	2171	2181	2171	2185	2196	2167	2182	2194	1.06646
Eulemur mongoz	male2	M	O	asct	4491	4520	4531	4486	4528	4542	4515	4535	4547	4519	4546	4557	0.452058
Eulemur mongoz	male1	M	O	asct	2129	2143	2158	2128	2143	2156	2114	2130	2142	2113	2130	2141	0.436776
Eulemur mongoz	male2	M	O	desct-head	1507	1523	1532	1506	1522	1531	1522	1536	1545	1518	1536	1544	0.768845
Eulemur mongoz	male2	M	V	asct	2705	2723	2736	2703	2723	2736	2686	2709	2720	2686	2707	2721	0.610429
Eulemur mongoz	male1	M	V	desct-side	3302	3313	3321	3321	3387	3393	3314	3359	3367	3303	3329	3337	0.379501
Eulemur mongoz	male2	M	V	desct-rump	3349	3393	3401	3337	3361	3374	3322	3353	3361	3357	3403	3426	0.292662
Eulemur mongoz	male2	M	V	asct	520	550	560	522	549	560	507	521	534	503	521	533
Eulemur mongoz	male2	M	V	desct-rump	1075	1114	1124	1099	1120	1137	1054	1101	1111	1069	1105	1118	0.376835
Eulemur mongoz	male1	M	V	asct	1204	1246	1258	1219	1250	1264	1241	1266	1276	1243	1266	1286	0.537693
Eulemur mongoz	male1	M	V	desct-side	1461	1477	1483	1477	1493	1498	1475	1485	1494	1467	1485	1491	0.401774
Eulemur mongoz	male1	M	V	asct	1827	1845	1855	1829	1847	1858	1843	1860	1870	1845	1863	1874	0.507311
Eulemur mongoz	male2	M	V	desct-side	82	114	126	107	131	138	86	121	131	104	132	140	0.382503
Eulemur mongoz	male2	M	V	desct-side	1094	1108	1118	1073	1094	1109	1078	1096	1103	1091	1111	1123	0.408305
Eulemur mongoz	male2	M	V	asct	1520	1542	1551	1521	1542	1549	1536	1555	1566	1535	1554	1565	0.391378
Eulemur mongoz	male2	M	V	asct	2649	2667	2677	2648	2668	2679	2637	2652	2661	2636	2650	2664	0.802749
Eulemur mongoz	male1	S	O	asct	47	75	87	46	78	86	34	53	70	30	51	68	0.965406
Eulemur mongoz	male1	S	O	asct	654	692	712	653	691	711	634	657	673	631	661	672	0.583277
Eulemur mongoz	male1	S	O	asct	3350	3387	3405	3349	3385	3404	3331	3353	3373	3331	3354	3373	0.636896
Eulemur mongoz	male2	S	O	desct-head	137	153	163	135	151	160	150	166	176	148	164	174	0.519094
Eulemur mongoz	male1	S	O	asct	567	585	597	565	584	595	555	568	583	552	569	580	1.35943
Eulemur mongoz	male2	S	O	desct-head	1038	1053	1060	1037	1052	1059	1029	1040	1052	1022	1039	1047	0.311919
Eulemur mongoz	male2	S	O	asct	1455	1470	1480	1453	1471	1479	1440	1457	1467	1441	1457	1466	0.632998
Eulemur mongoz	male1	S	O	desct-head	3511	3530	3537	3513	3530	3540	3499	3516	3525	3497	3514	3523	0.655642
Eulemur mongoz	male2	S	O	desct-head	4382	4410	4421	4384	4407	4419	4405	4428	4444	4397	4424	4436	0.499202
Eulemur mongoz	male2	S	O	desct-head	4421	4451	4461	4419	4449	4459	4444	4466	4476	4436	4464	4475
Eulemur mongoz	male2	S	O	asct	4789	4803	4814	4785	4804	4813	4773	4790	4802	4770	4789	4799	0.49913
Eulemur mongoz	male1	S	O	desct-head	7013	7030	7038	7010	7029	7039	6998	7016	7024	6996	7012	7022	0.80864
Eulemur mongoz	male2	S	V	asct	1494	1554	1569	1484	1551	1562	1531	1576	1594	1522	1572	1588	0.305962
Eulemur mongoz	male2	S	V	desct-side	2135	2169	2177	2123	2152	2165	2155	2189	2196	2143	2179	2187	0.417235
Eulemur mongoz	male2	S	V	asct	2761	2783	2794	2772	2797	2808	2742	2768	2777	2749	2782	2793	0.435545
Eulemur mongoz	male1	S	V	asct	3872	3893	3902	3870	3897	3909	3888	3907	3919	3891	3913	3928	0.600004
Eulemur mongoz	male1	S	V	desct-side	4075	4144	4155	4046	4106	4125	4071	4142	4151	4059	4108	4117	0.335747
Eulemur mongoz	male2	S	V	asct	4842	4869	4877	4839	4875	4888	4859	4888	4905	4865	4915	4931	0.332559
Eulemur mongoz	male1	S	V	asct	483	507	517	485	507	523	469	489	496	471	487	499	0.478707
Eulemur mongoz	male1	S	V	desct-side	871	882	891	870	883	887	859	874	880	855	870	877	0.494623
Eulemur mongoz	male1	S	V	asct	1276	1297	1306	1284	1307	1319	1257	1283	1293	1267	1287	1298	0.3213
Eulemur mongoz	male1	S	V	desct-side	1505	1525	1538	1530	1557	1567	1514	1537	1548	1518	1545	1555	0.414226
Eulemur mongoz	male1	S	V	desct-rump	2404	2443	2451	2437	2469	2477	2420	2453	2463	2416	2455	2465	0.374227
Eulemur mongoz	male2	S	V	desct-side	3175	3219	3225	3190	3240	3253	3174	3207	3215	3202	3230	3237	0.198226
Eulemur mongoz	male2	S	V	asct	3921	3941	3949	3922	3947	3961	3937	3955	3961	3940	3974	3986	0.382167
Eulemur mongoz	male2	S	V	desct-side	5013	5055	5061	5021	5046	5059	5007	5041	5047	5030	5061	5070	0.3263
Hapalemur occidentalis	male	L	V	desct-side	1117	1125	1129	1103	1125	1129	1121	1133	1138	1119	1137	1150	0.524707
Hapalemur occidentalis	male	L	V	asct	1523	1539	1545	1527	1545	1563	1503	1521	1527	1505	1524	1537	0.411758
Hapalemur occidentalis	male	L	V	desct-rump	2132	2141	2146	2123	2136	2141	2122	2132	2136	2132	2146	2152	0.770211
Hapalemur occidentalis	male	L	V	asct	2587	2607	2612	2590	2602	2612	2585	2600	2610	2597	2610	2624	0.731407
Hapalemur occidentalis	male	L	V	desct-side	4385	4399	4403	4401	4415	4423	4397	4405	4411	4389	4403	4411	0.377139
Hapalemur occidentalis	male	L	V	asct	5063	5113	5123	5077	5129	5141	5084	5141	5154	5091	5145	5156	0.196273
Hapalemur occidentalis	male	L	V	desct-rump	5557	5567	5581	5555	5585	5596	5554	5563	5574	5565	5596	5602	0.246578
Hapalemur occidentalis	male	L	V	asct	6047	6059	6065	6049	6051	6065	6045	6059	6065	6050	6063	6077	0.346968
Hapalemur occidentalis	male	L	O	desct-head	1398	1428	1436	1397	1431	1437	1382	1403	1411	1379	1408	1420	0.212243
Hapalemur occidentalis	male	L	O	asct	2885	2896	2909	2880	2895	2906	2898	2907	2923	2894	2906	2918	0.696842
Hapalemur occidentalis	male	L	O	asct	53	63	72	49	62	71	39	51	63	37	50	60	0.621464
Hapalemur occidentalis	male	L	O	desct-head	526	538	550	525	540	548	516	527	538	515	529	537	0.505609
Hapalemur occidentalis	male	L	O	desct-head	550	570	579	548	569	577	538	559	568	537	560	566
Hapalemur occidentalis	male	L	O	asct	941	949	965	934	947	959	953	962	974	948	960	972	0.663561
Hapalemur occidentalis	male	L	O	asct	1156	1167	1182	1149	1165	1176	1168	1181	1198	1164	1179	1192	0.348512
Hapalemur occidentalis	male	L	O	desct-head	3061	3077	3092	3057	3076	3087	3045	3061	3069	3042	3060	3066	0.433126
Hapalemur occidentalis	male	M	V	desct-rump	1703	1717	1725	1671	1702	1711	1675	1709	1715	1696	1715	1723	0.203454
Hapalemur occidentalis	male	M	V	asct	2167	2183	2193	2165	2183	2192	2152	2169	2181	2151	2171	2181	0.453361
Hapalemur occidentalis	male	M	V	desct-rump	2517	2531	2544	2519	2532	2545	2507	2525	2530	2505	2523	2533	0.294014
Hapalemur occidentalis	male	M	V	desct-side	6043	6068	6077	6022	6046	6056	6030	6059	6064	6039	6059	6073	0.115001
Hapalemur occidentalis	male	M	V	asct	7243	7259	7273	7240	7257	7269	7230	7243	7257	7228	7243	7254	0.602731
Hapalemur occidentalis	male	M	V	asct	7273	7292	7307	7269	7291	7305	7257	7273	7290	7254	7270	7289
Hapalemur occidentalis	male	M	V	desct-head	7755	7780	7785	7778	7808	7816	7756	7773	7780	7765	7787	7793	0.370695
Hapalemur occidentalis	male	M	V	asct	9416	9434	9448	9415	9435	9446	9432	9452	9464	9430	9452	9463	0.343739
Hapalemur occidentalis	male	M	O	asct	3536	3552	3565	3533	3553	3563	3554	3566	3577	3549	3567	3575	0.474661
Hapalemur occidentalis	male	M	O	desct-head	4202	4220	4232	4198	4217	4227	4217	4232	4242	4213	4231	4239	0.411565
Hapalemur occidentalis	male	M	O	asct	4645	4664	4677	4641	4665	4676	4629	4647	4663	4626	4646	4661	0.41794
Hapalemur occidentalis	male	M	O	desct-head	5243	5260	5273	5239	5258	5268	5258	5273	5288	5254	5271	5281	0.524762
Hapalemur occidentalis	male	M	O	desct-head	1402	1416	1430	1399	1417	1425	1390	1403	1415	1384	1403	1411	0.346421
Hapalemur occidentalis	male	M	O	asct	1773	1794	1813	1768	1795	1809	1792	1818	1833	1789	1823	1832	0.21988
Hapalemur occidentalis	male	M	O	desct-head	2300	2310	2322	2297	2311	2320	2287	2301	2312	2283	2300	2308	0.567671
Hapalemur occidentalis	male	M	O	asct	2721	2741	2757	2716	2742	2752	2701	2723	2741	2699	2724	2736	0.275254
Hapalemur occidentalis	male	S	V	desct-rump	2980	3029	3119	3011	3115	3123	2996	3051	3097	3033	3125	3136	0.204603
Hapalemur occidentalis	male	S	V	desct-rump	4168	4211	4270	4200	4302	4314	4200	4230	4280	4176	4288	4317	0.410445
Hapalemur occidentalis	male	S	V	asct	5169	5193	5209	5169	5198	5209	5151	5177	5191	5151	5177	5191	0.270172
Hapalemur occidentalis	male	S	V	asct	5209	5227	5237	5209	5231	5241	5191	5213	5223	5191	5214	5225
Hapalemur occidentalis	male	S	V	desct-head	5714	5762	5788	5737	5759	5763	5722	5770	5793	5729	5831	5851	0.271865
Hapalemur occidentalis	male	S	V	asct	6298	6320	6330	6296	6319	6328	6282	6302	6312	6281	6303	6313	0.460339
Hapalemur occidentalis	male	S	O	asct	1166	1180	1198	1160	1184	1194	1145	1167	1182	1140	1167	1178	0.345699
Hapalemur occidentalis	male	S	O	desct-head	1960	1981	1988	1956	1982	1987	1977	1992	2006	1976	1991	2002	0.285987
Hapalemur occidentalis	male	S	O	asct	3461	3472	3489	3457	3474	3486	3444	3459	3475	3444	3462	3472	0.574978
Hapalemur occidentalis	male	S	O	desct-head	1135	1155	1161	1130	1163	1171	1111	1138	1155	1108	1148	1154	0.329099
Hapalemur griseus	female	L	V	desct-rump	3810	3842	3846	3795	3816	3825	3806	3839	3843	3796	3833	3839	0.223952
Hapalemur griseus	female	L	V	desct-rump	7539	7548	7560	7538	7548	7561	7546	7562	7567	7545	7562	7569	0.314122
Eulemur mongoz	female	L	V	desct-rump	7886	7904	7911	7889	7904	7913	7870	7891	7898	7872	7891	7902	0.205392
Eulemur mongoz	female	L	V	asct	9010	9034	9046	9008	9035	9045	9017	9050	9063	9015	9049	9060	0.340358
Hapalemur griseus	female	L	V	asct	9062	9075	9087	9060	9080	9085	9072	9092	9096	9070	9088	9093	0.214693
Eulemur mongoz	female	L	V	desct-side	14689	14707	14709	14669	14700	14705	14694	14711	14718	14665	14695	14699	0.294752
Eulemur mongoz	female	L	V	asct	15263	15287	15297	15256	15283	15296	15280	15313	15323	15271	15312	15321	0.232636
Hapalemur griseus	female	L	V	asct	2611	2615	2618	2614	2616	2622	2611	2615	2618	2614	2616	2622	0.587054
Hapalemur griseus	female	L	V	asct	2618	2625	2628	2622	2628	2633	2618	2624	2628	2622	2628	2635
Hapalemur griseus	female	L	V	asct	2628	2653	2657	2633	2669	2677	2628	2655	2659	2635	2659	2665
Hapalemur griseus	female	L	V	desct-rump	2954	2959	2962	2950	2960	2966	2955	2963	2968	2942	2955	2959	0.423437
Hapalemur griseus	female	L	V	desct-rump	2962	2971	2974	2966	2977	2983	2968	2972	2976	2959	2968	2972
Eulemur mongoz	female	L	O	asct	426	439	461	423	444	459	438	459	479	435	466	477	0.285568
Eulemur mongoz	female	L	O	desct-side	536	572	580	566	580	588	543	571	579	569	589	597	0.365636
Hapalemur griseus	female	L	O	asct	4746	4764	4777	4744	4765	4777	4759	4782	4801	4757	4784	4799	0.306642
Hapalemur griseus	female	L	O	desct-side	6723	6741	6751	6718	6742	6748	6738	6755	6778	6731	6755	6773	0.528019
Hapalemur griseus	female	L	O	desct-head	0	0	0	0	0	0	0	0	0	0	0	0
Hapalemur griseus	female	L	O	desct-head	0	0	0	0	0	0	0	0	0	0	0	0
Eulemur mongoz	female	M	V	asct	620	642	652	612	641	650	605	627	636	604	615	635	0.67952
Eulemur mongoz	female	M	V	desct-rump	1365	1416	1422	1368	1416	1424	1406	1424	1431	1414	1424	1432	0.453492
Hapalemur griseus	female	M	V	asct	13840	13869	13876	13839	13870	13875	13859	13878	13892	13858	13879	13891	0.363041
Hapalemur griseus	female	M	V	desct-rump	16232	16245	16253	16217	16233	16244	16222	16233	16247	16232	16246	16255	0.492728
Eulemur mongoz	female	M	O	desct-head	1796	1821	1833	1790	1821	1831	1815	1841	1852	1814	1840	1850	0.17485
Eulemur mongoz	female	M	O	asct	2387	2406	2421	2383	2406	2418	2366	2388	2405	2362	2388	2402	0.662892
Eulemur mongoz	female	M	O	desct-head	3637	3674	3690	3636	3673	3688	3613	3646	3658	3607	3645	3656	0.141145
Hapalemur griseus	female	M	O	desct-head	4916	4940	4947	4909	4940	4946	4934	4955	4963	4933	4954	4962	0.270209
Hapalemur griseus	female	M	O	asct	11043	11088	11109	11036	11089	11105	11016	11052	11080	11015	11051	11070	0.141493
Hapalemur griseus	female	M	O	desct-head	14455	14479	14489	14448	14477	14486	14436	14460	14474	14430	14458	14470	0.251851
Hapalemur griseus	female	M	O	asct	15221	15260	15289	15215	15262	15283	15200	15224	15245	15193	15226	15241	0.252944
Eulemur mongoz	female	M	O	asct	8374	8422	8435	8388	8429	8446	8412	8444	8456	8419	8449	8464	0.172202
Hapalemur griseus	female	S	V	desct-rump	3863	3886	3930	3881	3918	3937	3879	3915	3904	3865	3894	3911	0.192196
Hapalemur griseus	female	S	V	asct	4565	4623	4633	4581	4619	4637	4587	4644	4655	4611	4644	4658	0.430838
Hapalemur griseus	female	S	V	desct-rump	5266	5289	5300	5258	5286	5296	5250	5270	5284	5241	5264	5282	0.456484
Hapalemur griseus	female	S	V	asct	5557	5583	5593	5559	5590	5604	5575	5600	5613	5577	5610	5627	0.358238
Hapalemur griseus	female	S	V	asct	5603	5645	5655	5605	5643	5654	5627	5668	5677	5629	5661	5678
Eulemur mongoz	female	S	V	desct-side	8662	8725	8740	8717	8726	8745	8700	8750	8760	8747	8780	8790	0.249807
Eulemur mongoz	female	S	V	asct	9128	9168	9179	9134	9191	9214	9086	9143	9155	9110	9149	9182	0.342399
Hapalemur griseus	female	S	O	desct-head	1417	1455	1473	1410	1445	1462	1439	1485	1495	1438	1493	1504	0.216649
Hapalemur griseus	female	S	O	desct-head	1417	1455	1473	1410	1445	1462	1439	1485	1495	1438	1493	1504
Hapalemur griseus	female	S	O	asct	6853	6892	6913	6850	6894	6911	6835	6866	6883	6833	6858	6878	0.308895
Hapalemur griseus	female	S	O	asct	4185	4218	4228	4183	4207	4231	4207	4241	4254	4202	4239	4256	0.360723
Hapalemur griseus	female	S	O	desct-side	5348	5387	5396	5344	5376	5402	5368	5410	5420	5359	5412	5422	0.222549
Eulemur mongoz	female	S	O	asct	9997	10050	10069	10004	10048	10072	9968	10012	10031	9965	10033	10045	0.194732
Eulemur mongoz	female	S	O	desct-side	10276	10325	10354	10280	10319	10356	10306	10396	10408	10309	10392	10410	0.206124
Saguinus oedipus	female	L	V	desct-side	3700	3730	3735	3716	3739	3753	3697	3731	3735	3709	3743	3751	0.206048
Saguinus oedipus	female	L	V	asct	3844	3851	3858	3851	3859	3867	3844	3852	3858	3850	3860	3867	0.97844
Saguinus oedipus	male	L	V	desct-head	1530	1549	1555	1540	1576	1588	1525	1542	1548	1539	1562	1566	0.251174
Saguinus oedipus	male	L	V	asct	1638	1647	1653	1645	1656	1661	1639	1648	1653	1645	1656	1661	0.885147
Saguinus oedipus	female	L	V	desct-side	31	68	76	55	82	93	38	75	80	56	83	95	0.432647
Saguinus oedipus	female	L	V	asct	3834	3868	3877	3838	3875	3881	3832	3851	3861	3844	3877	3885	0.205268
Saguinus oedipus	male	L	V	desct-head	4092	4122	4127	4098	4130	4138	4080	4100	4106	4084	4114	4119	0.319442
Saguinus oedipus	male	L	V	asct	5256	5268	5276	5264	5282	5287	5257	5277	5280	5265	5286	5293	0.409311
Saguinus oedipus	male	L	V	desct-side	2010	2028	2041	2020	2052	2060	2013	2038	2046	2022	2055	2064	0.247581
Saguinus oedipus	female	L	V	desct-head	4559	4607	4611	4588	4630	4643	4568	4598	4613	4582	4619	4631	0.12441
Saguinus oedipus	male	L	V	asct	5600	5627	5633	5625	5640	5646	5597	5627	5632	5626	5642	5652	0.818606
Saguinus oedipus	female	L	V	asct	5649	5667	5674	5655	5675	5682	5648	5665	5673	5655	5677	5685
Saguinus oedipus	male	L	O	desct-head	1023	1033	1037	1024	1035	1038	1017	1040	1047	1019	1042	1049	0.462643
Saguinus oedipus	male	L	O	asct	1370	1379	1388	1377	1395	1402	1370	1379	1387	1377	1395	1402	0.528312
Saguinus oedipus	female	L	O	desct-head	466	487	491	470	488	492	478	494	502	480	494	503	0.366886
Saguinus oedipus	female	L	O	asct	2362	2373	2379	2368	2383	2387	2361	2372	2381	2369	2388	2397	0.362981
Saguinus oedipus	male	L	O	asct	2889	2911	2919	2896	2916	2924	2889	2899	2909	2898	2900	2908	0.393899
Saguinus oedipus	male	L	O	desct-side	4603	4632	4638	4620	4652	4659	4602	4625	4640	4621	4651	4661	0.235409
Saguinus oedipus	female	L	O	asct	6253	6266	6273	6260	6275	6286	6251	6263	6274	6261	6276	6287	0.707604
Saguinus oedipus	male	L	O	asct	7094	7110	7118	7095	7111	7119	7084	7100	7108	7085	7101	7109	0.306328
Saguinus oedipus	male	L	O	desct-head	7390	7405	7416	7388	7405	7415	7380	7392	7403	7381	7393	7403	0.488512
Saguinus oedipus	female	L	O	desct-head	7375	7392	7397	7390	7400	7410	7375	7392	7397	7389	7400	7410
Saguinus oedipus	male	M	V	asct	1302	1331	1342	1302	1334	1344	1290	1314	1327	1291	1318	1328	0.295174
Saguinus oedipus	male	M	V	desct-side	1573	1654	1664	1565	1633	1643	1583	1647	1660	1560	1628	1646	0.248906
Saguinus oedipus	male	M	V	asct	626	641	648	627	646	650	637	652	659	639	656	660	0.405432
Saguinus oedipus	male	M	V	desct-side	730	800	805	745	814	828	731	788	801	746	810	829	0.226866
Saguinus oedipus	male	M	V	asct	859	880	888	862	884	889	875	893	900	874	895	901	0.415993
Saguinus oedipus	male	M	V	desct-side	970	993	998	965	981	992	976	996	1002	963	974	984	0.312428
Saguinus oedipus	female	M	V	desct-head	29	54	63	39	63	71	28	47	63	39	62	76	0.556133
Saguinus oedipus	female	M	V	asct	54	76	85	55	78	86	41	60	71	41	63	70	0.222953
Saguinus oedipus	female	M	V	asct	85	115	123	86	116	123	71	101	111	70	102	111
Saguinus oedipus	female	M	V	desct-side	213	291	302	234	327	334	215	292	305	236	318	329	0.400607
Saguinus oedipus	female	M	V	asct	1924	1947	1955	1926	1951	1956	1911	1932	1942	1912	1939	1945	0.286979
Saguinus oedipus	female	M	V	desct-side	2136	2157	2172	2154	2179	2192	2135	2163	2171	2153	2177	2184	0.342472
Saguinus oedipus	male	M	O	desct-head	211	232	245	214	237	248	198	216	228	200	218	230	0.203428
Saguinus oedipus	female	M	O	desct-head	274	287	292	274	287	294	283	295	305	285	296	306	0.413843
Saguinus oedipus	female	M	O	asct	549	569	589	549	571	588	565	590	596	565	589	595	0.579625
Saguinus oedipus	male	M	O	asct	577	598	610	575	601	611	592	613	622	593	614	621	0.431943
Saguinus oedipus	male	M	O	asct	949	967	977	950	970	980	962	983	993	967	985	995	0.325066
Saguinus oedipus	male	M	O	desct-head	1059	1074	1089	1058	1076	1088	1073	1090	1101	1074	1092	1103	0.289321
Saguinus oedipus	male	M	O	asct	532	554	563	531	555	564	549	568	579	549	569	580	0.268762
Saguinus oedipus	male	M	O	desct-head	669	689	696	683	706	714	666	686	694	682	712	715	0.318892
Saguinus oedipus	female	M	O	asct	1729	1754	1769	1734	1756	1772	1711	1739	1748	1712	1741	1751	0.181051
Saguinus oedipus	female	M	O	desct-head	2750	2783	2794	2776	2810	2828	2749	2784	2795	2777	2812	2832	0.155942
Saguinus oedipus	female	S	V	asct	1590	1632	1646	1591	1639	1653	1622	1659	1667	1619	1660	1669	0.151397
Saguinus oedipus	male	S	V	asct	137	167	176	137	170	180	160	188	197	155	191	199	0.273133
Saguinus oedipus	female	S	V	asct	1183	1216	1230	1183	1217	1227	1208	1244	1255	1209	1245	1253	0.357074
Saguinus oedipus	female	S	V	asct	2339	2363	2377	2341	2365	2380	2354	2390	2397	2356	2392	2400	0.33664
Saguinus oedipus	male	S	V	asct	0	19	32	1	23	35	16	40	53	16	42	52	0.274256
Saguinus oedipus	male	S	V	asct	927	947	973	925	957	972	908	930	938	910	941	949	0.34739
Saguinus oedipus	female	S	V	desct-side	57	92	102	83	102	112	58	86	98	83	105	114	0.278557
Saguinus oedipus	male	S	V	desct-side	815	846	858	833	866	880	813	843	857	833	866	880	0.434999
Saguinus oedipus	female	S	V	desct-rump	2075	2103	2113	2074	2106	2112	2080	2135	2141	2078	2129	2135	0.5
Saguinus oedipus	male	S	V	desct-head	1113	1151	1154	1131	1156	1162	1121	1147	1150	1125	1153	1161	0.204624
Saguinus oedipus	male	S	V	desct-side	8944	8971	8991	8967	9005	9010	8942	8970	8986	8968	8997	9020	0.307648
Saguinus oedipus	male	S	O	asct	2329	2360	2370	2330	2366	2377	2310	2338	2348	2311	2348	2358	0.202761
Saguinus oedipus	male	S	O	asct	4568	4597	4608	4572	4604	4612	4584	4615	4626	4597	4624	4632	0.280947
Saguinus oedipus	female	S	O	desct-head	125	140	146	121	143	148	136	150	156	138	153	157	0.443838
Saguinus oedipus	female	S	O	desct-head	258	272	281	260	277	282	269	284	292	270	289	294	0.370279
Saguinus oedipus	male	S	O	desct-head	4253	4273	4282	4253	4289	4297	4236	4257	4264	4240	4264	4270	0.332148
Saguinus oedipus	female	S	O	asct	5209	5230	5236	5212	5233	5238	5196	5218	5226	5199	5221	5229	0.140753
Saguinus oedipus	male	S	O	asct	5355	5391	5403	5360	5395	5405	5373	5407	5435	5387	5410	5436	0.423316
Saguinus oedipus	female	S	O	desct-head	6126	6146	6155	6127	6146	6156	6108	6131	6140	6109	6128	6142	0.399904
Saguinus oedipus	female	S	O	asct	652	674	680	654	682	689	642	660	670	644	659	672	0.231654
Saguinus oedipus	male	S	O	asct	2106	2120	2129	2099	2124	2131	2083	2108	2116	2081	2114	2117	0.223438
Saguinus oedipus	male	S	O	desct-head	2490	2513	2522	2493	2515	2525	2506	2530	2537	2509	2533	2544	0.206851
Aotus lemurinus	male	L	V	desct-side	2467	2503	2511	2475	2577	2592	2469	2500	2513	2477	2581	2591	0.159382
Aotus lemurinus	female	L	V	desct-side	805	839	849	783	817	825	815	850	858	809	843	851	0.467747
Aotus lemurinus	female	L	V	desct-side	849	871	889	825	860	870	858	894	905	851	870	877
Aotus lemurinus	male	L	V	asct	75	108	116	84	117	123	93	125	133	107	134	140	0.497523
Aotus lemurinus	female	L	V	asct	1846	1896	1921	1845	1899	1919	1880	1930	1952	1878	1933	1950	0.382495
Aotus lemurinus	male	L	V	desct-side	741	769	785	763	783	797	745	769	786	763	783	797	0.515468
Aotus lemurinus	male	L	V	asct	409	437	445	410	439	449	425	449	463	431	451	467	0.315289
Aotus lemurinus	female	L	V	desct-side	1503	1529	1540	1523	1544	1561	1507	1527	1543	1521	1543	1559	0.712364
Aotus lemurinus	male	L	V	asct	1706	1738	1750	1709	1743	1752	1720	1757	1770	1721	1759	1771	0.376523
Aotus lemurinus	male	L	V	desct-rump	2260	2319	2340	2288	2416	2424	2266	2322	2335	2294	2425	2443	0.168169
Aotus lemurinus	female	L	V	asct	5349	5399	5418	5363	5410	5419	5381	5425	5435	5393	5435	5445	0.195115
Aotus lemurinus	female	L	V	asct	7673	7697	7716	7673	7709	7719	7656	7677	7696	7657	7683	7697	0.242699
Aotus lemurinus	female	L	O	desct-head	21	53	67	22	55	69	45	80	89	47	71	86	0.358033
Aotus lemurinus	male	L	O	desct-head	627	663	673	655	707	719	627	663	673	655	707	717	0.211303
Aotus lemurinus	male	L	O	desct-head	1722	1767	1779	1749	1785	1791	1717	1761	1776	1759	1795	1801	0.273848
Aotus lemurinus	female	L	O	desct-head	201	251	261	221	255	266	180	231	239	183	236	243	0.544743
Aotus lemurinus	female	L	O	desct-head	559	629	634	583	637	647	557	623	629	577	638	645	0.219441
Aotus lemurinus	female	L	O	asct	903	929	939	905	940	949	895	929	938	897	950	962	0.389567
Aotus lemurinus	male	L	O	asct	936	961	974	935	961	973	923	947	958	925	947	957	0.41053
Aotus lemurinus	male	L	O	asct	726	753	766	723	751	764	698	730	750	695	729	748	0.379586
Aotus lemurinus	male	L	O	desct-side	1591	1629	1633	1607	1659	1675	1591	1627	1632	1605	1655	1669	0.340793
Aotus lemurinus	male	L	O	asct	2440	2447	2454	2445	2455	2465	2440	2447	2454	2445	2455	2465	0.45853
Aotus lemurinus	female	L	O	desct-head	131	167	173	145	179	192	133	167	174	145	179	192	0.277865
Aotus lemurinus	female	L	O	asct	1838	1872	1882	1836	1873	1881	1867	1883	1895	1865	1883	1893	0.122011
Aotus lemurinus	male	M	V	asct	2055	2085	2099	2049	2095	2108	2029	2063	2081	2025	2059	2077	0.326649
Aotus lemurinus	female	M	V	asct	233	275	289	240	281	290	214	241	261	216	251	267	0.199421
Aotus lemurinus	male	M	V	asct	1945	1971	1993	1943	1979	1993	1968	1998	2018	1965	2003	2017	0.289504
Aotus lemurinus	male	M	V	desct-side	2357	2384	2401	2375	2408	2420	2353	2391	2398	2380	2411	2424	0.594693
Aotus lemurinus	male	M	V	asct	3069	3087	3097	3067	3082	3095	3083	3107	3123	3080	3103	3119	0.36378
Aotus lemurinus	male	M	V	desct-side	3608	3638	3646	3630	3655	3667	3611	3641	3648	3642	3662	3675	0.483384
Aotus lemurinus	female	M	V	asct	6375	6415	6433	6383	6423	6439	6351	6386	6403	6356	6395	6413	0.385604
Aotus lemurinus	female	M	V	desct-side	2357	2384	2401	2375	2408	2420	2353	2391	2398	2380	2411	2424
Aotus lemurinus	female	M	V	desct-side	3608	3638	3646	3630	3655	3667	3611	3641	3648	3642	3662	3675
Aotus lemurinus	male	M	O	desct-side	5521	5558	5569	5555	5584	5601	5516	5557	5573	5547	5580	5597	0.255993
Aotus lemurinus	female	M	O	asct	3817	3835	3841	3819	3835	3843	3829	3849	3869	3832	3849	3871	0.360386
Aotus lemurinus	female	M	O	desct-head	4433	4457	4471	4430	4459	4469	4447	4479	4493	4443	4476	4491	0.464306
Aotus lemurinus	male	M	O	desct-head	2039	2043	2051	2035	2043	2057	2017	2061	2073	2019	2067	2079	0.369138
Aotus lemurinus	male	M	O	asct	6268	6311	6327	6268	6307	6327	6305	6333	6353	6300	6341	6353	0.265555
Aotus lemurinus	male	M	O	asct	3027	3051	3069	3013	3049	3067	2999	3027	3051	2997	3028	3041	0.418414
Aotus lemurinus	male	M	O	asct	3069	3103	3125	3067	3107	3123	3051	3077	3097	3041	3079	3091
Aotus lemurinus	male	M	O	desct-side	5269	5311	5323	5282	5325	5333	5266	5300	5320	5296	5335	5349	0.280969
Aotus lemurinus	female	M	O	asct	357	377	397	353	381	393	379	403	419	373	403	415	0.705167
Aotus lemurinus	female	M	O	desct-head	2205	2237	2247	2206	2239	2247	2227	2256	2270	2227	2257	2269	0.79907
Aotus lemurinus	female	M	O	asct	566	589	605	560	591	603	587	615	633	579	609	629	0.569728
Aotus lemurinus	female	M	O	desct-head	1897	1917	1927	1897	1919	1927	1913	1933	1945	1913	1935	1943	0.681247
Aotus lemurinus	male	M	O	asct	535	565	592	534	569	589	514	543	563	513	541	558	0.336461
Aotus lemurinus	female	S	V	asct	2543	2597	2609	2540	2601	2613	2589	2617	2629	2588	2624	2638	0.298475
Aotus lemurinus	male	S	V	asct	750	795	811	752	798	813	773	819	835	775	823	837	0.237591
Aotus lemurinus	male	S	V	desct-side	2474	2515	2527	2493	2531	2542	2467	2509	2524	2501	2537	2547	0.519163
Aotus lemurinus	male	S	V	asct	1945	1971	1992	1943	1980	1991	1968	1993	2016	1965	1999	2016	0.429554
Aotus lemurinus	male	S	V	desct-side	2355	2385	2403	2375	2413	2423	2353	2393	2401	2377	2408	2426	0.551764
Aotus lemurinus	female	S	V	asct	3069	3087	3101	3064	3087	3096	3081	3107	3126	3076	3103	3121	0.632505
Aotus lemurinus	female	S	V	desct-side	3607	3643	3654	3631	3661	3674	3611	3645	3657	3641	3659	3677	0.547854
Aotus lemurinus	male	S	O	asct	1689	1731	1753	1688	1733	1751	1723	1759	1788	1721	1762	1786	0.330478
Aotus lemurinus	female	S	O	asct	23	43	56	17	41	53	2	25	39	0	23	37	0.672183
Aotus lemurinus	female	S	O	asct	56	87	99	53	85	96	39	63	80	37	65	75
Aotus lemurinus	female	S	O	desct-head	361	385	395	363	383	397	342	369	379	343	367	380	0.606566
Aotus lemurinus	female	S	O	desct-head	395	420	429	397	417	429	379	403	414	380	401	413
Aotus lemurinus	male	S	O	desct-head	221	245	255	220	243	257	201	227	239	201	225	239	0.335194
Aotus lemurinus	male	S	O	asct	347	381	401	347	379	399	371	411	435	371	409	433	0.221072
Aotus lemurinus	male	S	O	asct	401	446	474	399	443	471	435	489	514	433	485	511
Aotus lemurinus	male	S	O	desct-head	882	919	929	885	917	931	903	945	955	911	943	957	0.347961
Aotus lemurinus	male	S	O	desct-head	929	968	977	931	966	979	955	988	997	957	989	1004
Saguinus imperator	male	L	V	desct-head	896	921	923	914	925	936	894	915	920	910	924	935	0.341444
Saguinus imperator	male	L	V	asct	1053	1074	1082	1071	1082	1090	1055	1075	1083	1073	1083	1092	0.414
Saguinus imperator	male	L	V	asct	1490	1496	1502	1493	1499	1506	1489	1496	1501	1493	1499	1505	1
Saguinus imperator	female	L	V	asct	11298	11301	11307	11301	11306	11310	11298	11302	11307	11301	11306	11310	0.9
Saguinus imperator	female	L	V	desct-head	12558	12574	12581	12560	12577	12583	12568	12583	12589	12570	12585	12591	0.364251
Saguinus imperator	female	L	V	desct-head	12589	12612	12617	12610	12620	12629	12588	12612	12618	12610	12621	12630
Saguinus imperator	male	L	V	desct-side	1878	1898	1901	1886	1903	1908	1879	1889	1895	1885	1898	1907	0.189679
Saguinus imperator	male	L	V	asct	2031	2040	2050	2039	2046	2055	2031	2038	2050	2037	2044	2056	1.05054
Saguinus imperator	female	L	V	asct	6469	6479	6484	6474	6489	6496	6469	6480	6484	6475	6490	6496	0.686429
Saguinus imperator	female	L	V	desct-side	8885	8900	8908	8897	8911	8929	8883	8901	8907	8898	8912	8930	0.201826
Saguinus imperator	male	L	O	asct	2326	2332	2338	2333	2340	2346	2328	2334	2340	2332	2337	2345	0.931563
Saguinus imperator	male	L	O	desct-head	2354	2372	2383	2353	2377	2387	2345	2358	2368	2345	2358	2370	0.514696
Saguinus imperator	female	L	O	asct	6704	6716	6730	6703	6717	6726	6714	6731	6739	6714	6730	6738	0.0580482
Saguinus imperator	female	L	O	desct-head	10848	10870	10879	10851	10873	10881	10842	10854	10864	10840	10853	10865	0.328711
Saguinus imperator	male	L	O	desct-side	4923	4950	4958	4942	4966	4971	4927	4950	4958	4941	4964	4970	0.148437
Saguinus imperator	male	L	O	asct	6175	6186	6194	6183	6191	6200	6175	6186	6194	6181	6191	6200	0.980451
Saguinus imperator	female	M	O	asct	586	598	609	584	599	608	578	588	596	576	588	595	0.681928
Saguinus imperator	male	M	O	desct-head	2693	2704	2709	2695	2706	2711	2702	2712	2717	2703	2716	2722	0.793739
Saguinus imperator	male	M	O	asct	14794	14805	14814	14793	14806	14813	14783	14797	14804	14782	14797	14803	0.729066
Saguinus imperator	female	M	O	desct-head	10330	10346	10358	10331	10347	10361	10318	10334	10342	10318	10335	10344	0.474886
Saguinus imperator	female	M	O	asct	1230	1243	1255	1229	1247	1254	1243	1256	1263	1242	1256	1262	0.254696
Saguinus imperator	male	M	O	desct-head	2693	2704	2709	2695	2706	2711	2702	2712	2717	2703	2716	2722
Saguinus imperator	male	M	V	asct	1557	1586	1596	1556	1583	1593	1576	1600	1608	1573	1600	1610	0.210988
Saguinus imperator	male	M	V	asct	8626	8642	8654	8625	8645	8653	8641	8653	8673	8637	8661	8671	0.245533
Saguinus imperator	female	M	V	desct-side	9317	9342	9357	9338	9360	9373	9320	9346	9359	9338	9363	9374	0.19657
Saguinus imperator	female	M	V	asct	683	699	714	675	704	714	694	727	740	698	726	736	0.306943
Saguinus imperator	male	M	V	desct-side	2242	2276	2296	2274	2306	2316	2244	2292	2298	2270	2301	2309	0.378729
Saguinus imperator	female	M	V	desct-head	18056	18089	18097	18069	18119	18124	18054	18095	18109	18074	18114	18125	0.059799
Saguinus imperator	female	M	V	asct	18311	18330	183445	18306	18331	18341	18295	18317	18327	18293	18317	18325	0.370039
Saguinus imperator	male	M	V	desct-side	18969	19002	19013	18993	19017	19026	18968	19004	19012	18993	19018	19026	0.197809
Saguinus imperator	female	S	V	asct	2291	2301	2311	2289	2301	2309	2283	2290	2300	2281	2290	2298	0.376096
Saguinus imperator	female	S	V	desct-side	2882	2919	2936	2909	2946	2963	2880	2915	2934	2911	2947	2965	0.156731
Saguinus imperator	male	S	V	asct	2506	2521	2527	2503	2518	2525	2494	2511	2516	2491	2507	2513	0.566769
Saguinus imperator	male	S	V	desct-head	3142	3158	3164	3145	3160	3167	3154	3167	3170	3156	3168	3172	0.270319
Saguinus imperator	female	S	V	asct	5221	5241	5254	5218	5243	5250	5205	5227	5239	5204	5230	5237	0.188814
Saguinus imperator	male	S	V	asct	4428	4449	4455	4424	4448	4454	4419	4435	4445	4418	4435	4444	0.33064
Saguinus imperator	male	S	V	asct	5887	5908	5916	5883	5905	5913	5870	5893	5902	5868	5890	5898	0.477191
Saguinus imperator	female	S	V	desct-side	6821	6847	6859	6836	6861	6871	6817	6846	6857	6838	6864	6872	0.218166
Saguinus imperator	female	S	V	desct-side	8627	8649	8658	8645	8672	8682	8624	8653	8665	8645	8675	8686	0.0532245
Saguinus imperator	male	S	V	desct-side	9994	10035	10043	10018	10049	10058	9992	10031	10039	10020	10055	10065	0.172834
Saguinus imperator	male	S	O	asct	683	699	715	673	706	714	652	684	697	648	688	696	0.352484
Saguinus imperator	female	S	O	asct	2479	2495	2505	2477	2497	2503	2494	2505	2515	2490	2507	2513	0.54984
Saguinus imperator	female	S	O	asct	10074	10097	10113	10072	10101	10112	10063	10077	10088	10059	10078	10088	0.196276
Saguinus imperator	male	S	O	desct-side	415	448	454	445	469	474	413	449	454	443	471	477	0.136147
Saguinus imperator	male	S	O	desct-side	454	483	491	474	518	528	454	484	487	477	517	521
Saguinus imperator	male	S	O	asct	637	670	690	655	684	691	635	679	688	648	682	690	0.333759
Saguinus imperator	female	S	O	desct-head	6252	6268	6274	6265	6288	6300	6250	6278	6287	6267	6289	6300	0.168388
Saguinus imperator	female	S	O	desct-side	7151	7189	7195	7182	7210	7215	7149	7186	7193	7185	7211	7218	0.159723
Saimiri boliviensis	male2	L	V	asct	353	364	370	353	365	372	347	354	363	346	355	363	0.501496
Saimiri boliviensis	male2	L	V	desct-side	834	850	860	845	858	870	834	848	859	845	860	870	0.596986
Saimiri boliviensis	male1	L	V	desct-side	1624	1653	1663	1644	1662	1676	1621	1653	1662	1645	1663	1676	0.359792
Saimiri boliviensis	female	L	V	asct	1786	1806	1814	1784	1803	1811	1799	1817	1832	1798	1822	1831	0.442989
Saimiri boliviensis	female	L	V	desct-rump	2014	2025	2034	2009	2017	2039	2012	2030	2037	2009	2017	2039	0.41347
Saimiri boliviensis	male2	L	V	asct	2468	2475	2482	2474	2485	2498	2468	2478	2484	2474	2486	2499	0.69755
Saimiri boliviensis	female	L	V	asct	4244	4270	4283	4250	4274	4280	4245	4261	4267	4249	4258	4268	0.590941
Saimiri boliviensis	male2	L	V	asct	5151	5188	5198	5162	5207	5217	5151	5197	5203	5163	5207	5216	1.03452
Saimiri boliviensis	male1	L	V	asct	5578	5594	5602	5578	5598	5603	5588	5606	5616	5588	5608	5617	0.35718
Saimiri boliviensis	male2	L	V	desct-side	7520	7546	7555	7537	7565	7577	7525	7545	7560	7538	7565	7578	0.331087
Saimiri boliviensis	female	L	V	desct-rump	8460	8474	8480	8469	8484	8495	8457	8469	8481	8470	8483	8496	0.184597
Saimiri boliviensis	female	L	V	asct	9900	9926	9939	9904	9930	9942	9880	9909	9916	9883	9911	9923	0.247124
Saimiri boliviensis	female	L	V	asct	10864	10882	10896	10863	10883	10894	10877	10905	10918	10877	10906	10913	0.216568
Saimiri boliviensis	female	L	V	desct-side	11169	11181	11189	11175	11200	11211	11160	11187	11194	11175	11200	11209	0.33119
Saimiri boliviensis	male2	L	O	desct-head	650	676	686	653	677	689	668	699	717	670	700	718	0.249633
Saimiri boliviensis	male1	L	O	desct-head	1100	1118	1127	1101	1119	1128	1085	1101	1111	1086	1101	1112	0.431473
Saimiri boliviensis	female	L	O	desct-head	3276	3297	3315	3298	3314	3324	3279	3293	3317	3291	3310	3320	0.385148
Saimiri boliviensis	female	L	O	asct	3347	3353	3367	3354	3363	3376	3345	3356	3365	3353	3362	3375	0.703626
Saimiri boliviensis	male2	L	O	desct-head	5009	5034	5045	5011	5036	5047	4998	5014	5024	5000	5018	5030	0.477277
Saimiri boliviensis	male2	L	O	asct	5460	5474	5484	5470	5482	5491	5459	5474	5483	5472	5478	5489	0.644576
Saimiri boliviensis	female	L	O	desct-head	5687	5704	5717	5688	5705	5718	5673	5691	5701	5675	5690	5702	0.396131
Saimiri boliviensis	female	L	O	asct	5687	5704	5717	5688	5705	5718	5673	5691	5701	5675	5690	5702
Saimiri boliviensis	female	M	V	asct	3101	3122	3133	3099	3123	3132	3122	3138	3149	3119	3140	3147	0.791175
Saimiri boliviensis	female	M	V	desct-side	6204	6236	6243	6227	6248	6258	6205	6232	6244	6227	6248	6258	0.444953
Saimiri boliviensis	male	M	V	asct	8365	8378	8391	8363	8381	8392	8375	8400	8410	8372	8399	8408	0.521183
Saimiri boliviensis	male	M	V	desct-side	8517	8542	8561	8535	8572	8581	8529	8545	8562	8533	8565	8576	0.447181
Saimiri boliviensis	male	M	V	asct	2004	2029	2048	2003	2026	2037	2024	2053	2068	2019	2049	2063	0.555293
Saimiri boliviensis	female	M	V	asct	2572	2594	2607	2570	2598	2607	2585	2611	2626	2591	2616	2625	0.483827
Saimiri boliviensis	female	M	V	asct	4943	4961	4972	4943	4961	4969	4929	4945	4956	4927	4947	4955	0.824581
Saimiri boliviensis	female	M	V	desct-side	5081	5118	5128	5106	5133	5142	5083	5114	5130	5103	5133	5140	0.566739
Saimiri boliviensis	female	M	V	desct-side	7670	7692	7703	7688	7713	7731	7674	7694	7706	7688	7711	7730	0.18719
Saimiri boliviensis	male	M	V	desct-side	8142	8175	8191	8166	8197	8210	8143	8177	8192	8166	8197	8210	0.342554
Saimiri boliviensis	male	M	V	asct	9852	9868	9882	9848	9870	9880	9839	9856	9865	9836	9854	9862	0.482215
Saimiri boliviensis	male	M	V	desct-side	11243	11277	11302	11269	11307	11316	11246	11276	11303	11264	11303	11314	0.379863
Saimiri boliviensis	male	M	V	desct-head	11634	11662	11673	11646	11662	11670	11634	11650	11661	11640	11650	11656	0.510508
Saimiri boliviensis	female	M	V	desct-head	12542	12562	12569	12560	12601	12612	12548	12563	12572	12558	12575	12584	0.391685
Saimiri boliviensis	female	M	V	asct	14350	14380	14391	14346	14374	14385	14364	14397	14407	14366	14396	14412	0.33096
Saimiri boliviensis	male	M	O	desct-head	633	646	655	631	647	653	627	638	645	625	637	643	0.450274
Saimiri boliviensis	male	M	O	asct	8792	8804	8812	8791	8806	8811	8781	8796	8805	8780	8797	8802	1.27704
Saimiri boliviensis	male	M	O	desct-head	8959	8984	8994	8956	8985	8995	8941	8965	8975	8943	8966	8976	0.274118
Saimiri boliviensis	female	M	O	asct	758	774	784	756	775	785	772	788	800	768	788	799	0.607862
Saimiri boliviensis	male	M	O	asct	1196	1209	1216	1193	1209	1215	1185	1199	1208	1184	1198	1207	0.934663
Saimiri boliviensis	male	M	O	desct-head	1734	1756	1765	1736	1753	1763	1749	1770	1779	1750	1765	1778	0.495082
Saimiri boliviensis	female	M	O	desct-head	6035	6057	6066	6033	6055	6060	6053	6071	6079	6050	6068	6078	0.447317
Saimiri boliviensis	female	M	O	asct	7485	7498	7507	7481	7499	7506	7471	7487	7497	7468	7488	7495	0.619007
Saimiri boliviensis	female	M	O	desct-head	8318	8347	8358	8338	8363	8377	8315	8342	8356	8328	8352	8373	0.350901
Saimiri boliviensis	female	M	O	asct	8955	8968	8979	8944	8965	8975	8931	8953	8969	8926	8950	8961	0.63828
Saimiri boliviensis	male	S	V	asct	10658	10694	10704	10660	10699	10709	10687	10707	10718	10683	10710	10715	0.399064
Saimiri boliviensis	male	S	V	desct-side	15231	15257	15282	15250	15301	15318	15229	15262	15280	15252	15305	15320	0.248897
Saimiri boliviensis	male	S	V	asct	18321	18342	18352	18319	18345	18347	18331	18354	18378	18328	18359	18375	0.244102
Saimiri boliviensis	female	S	V	asct	2641	2666	2683	2643	2670	2697	2607	2647	2656	2605	2649	2665	0.641163
Saimiri boliviensis	female	S	V	asct	2939	2965	2979	2938	2967	2975	2913	2944	2964	2906	2951	2962	0.256233
Saimiri boliviensis	female	S	V	asct	2979	3008	3018	2975	3007	3016	2964	2982	2989	2962	2984	2994
Saimiri boliviensis	female	S	V	desct-head	791	815	826	789	813	825	766	799	808	765	797	806	0.300151
Saimiri boliviensis	female	S	V	desct-head	2955	2990	3002	2948	2991	3000	2923	2974	2988	2918	2975	2987	0.2558
Saimiri boliviensis	male	S	V	asct	3204	3238	3251	3210	3243	3250	3187	3213	3232	3183	3225	3234	0.962095
Saimiri boliviensis	male	S	V	desct-side	15231	15257	15282	15250	15301	15318	15229	15262	15280	15252	15305	15320
Saimiri boliviensis	male	S	O	desct-head	5531	5553	5563	5530	5550	5561	5507	5536	5548	5506	5533	5548	0.332292
Saimiri boliviensis	male	S	O	asct	9810	9837	9850	9809	9834	9848	9766	9812	9829	9765	9816	9828	0.276816
Saimiri boliviensis	female	S	O	desct-head	13194	13224	13235	13193	13216	13231	13214	13239	13247	13213	13237	13247	0.526478
Saimiri boliviensis	female	S	O	asct	19473	19502	19518	19473	19504	19516	19450	19480	19496	19450	19481	19493	0.169744
Saimiri boliviensis	male	S	O	desct-side	19961	19981	19997	19978	20005	20030	19964	19983	19995	19965	20003	20014	0.573932
Saimiri boliviensis	male	S	O	desct-side	23490	23521	23537	23520	23558	23579	23493	23532	23540	23517	23546	23577	0.195434
Saimiri boliviensis	male	S	O	desct-side	23537	23582	23600	23579	23623	23637	23540	23591	23605	23577	23615	23632
Saimiri boliviensis	male	S	O	asct	24023	24044	24055	24017	24043	24051	24000	24027	24039	23994	24025	24036	0.267077
Saimiri boliviensis	male	S	O	asct	24362	24379	24399	24360	24384	24397	24376	24406	24417	24371	24406	24415	0.498358
Saimiri boliviensis	female	S	O	desct-head	25555	25597	25610	25588	25626	25634	25569	25599	25614	25584	25621	25627	0.276282
Saimiri boliviensis	female	S	O	asct	25673	25694	25703	25671	25699	25707	25694	25715	25735	25685	25713	25734	0.593601
Saimiri boliviensis	male	S	O	desct-head	25774	25795	25798	25796	25813	25824	25782	25803	25810	25793	25809	25821	0.841177
Eulemur coronatus	female	L	O	asct	2423	2469	2490	2424	2471	2488	2450	2495	2514	2452	2497	2515	0.344536
Eulemur coronatus	male2	L	O	desct-head	2845	2858	2866	2847	2859	2867	2831	2848	2857	2832	2849	2858	0.637465
Eulemur coronatus	female	L	O	asct	4063	4098	4113	4060	4097	4112	4030	4070	4090	4026	4067	4088	0.428918
Eulemur coronatus	male3	L	O	asct	4327	4345	4360	4328	4346	4359	4308	4326	4344	4308	4325	4338	0.854
Eulemur coronatus	male3	L	O	desct-side	14061	14089	14101	14083	14110	14126	14063	14085	14106	14081	14109	14124	0.688375
Eulemur coronatus	male3	L	O	asct	15134	15154	15181	15133	15156	15176	15152	15182	15204	15150	15185	15200	0.28564
Eulemur coronatus	male3	L	O	asct	17497	17528	17542	17495	17529	17544	17473	17501	17518	17471	17502	17517	0.236538
Eulemur coronatus	male3	L	O	desct-side	17682	17713	17723	17701	17735	17750	17688	17715	17727	17697	17729	17748	0.736008
Eulemur coronatus	male2	L	O	asct	22309	22327	22338	22327	22335	22351	22313	22327	22339	22317	22333	22348	0.53295
Eulemur coronatus	male1	L	O	desct-head	1488	1503	1513	1490	1503	1515	1501	1517	1527	1503	1518	1527	1.25363
Eulemur coronatus	male1	L	O	desct-head	4153	4174	4182	4155	4176	4186	4170	4188	4197	4172	4191	4202	0.473361
Eulemur coronatus	male1	L	O	desct-head	5284	5302	5310	5286	5303	5314	5274	5288	5298	5276	5289	5300	0.2154
Eulemur coronatus	male3	L	V	desct-side	337	351	356	350	362	367	339	354	358	347	360	365	0.459944
Eulemur coronatus	male3	L	V	asct	495	502	508	494	501	507	482	495	501	481	494	500	1
Eulemur coronatus	male2	L	V	desct-side	746	761	768	752	776	781	745	759	764	755	778	784	0.220143
Eulemur coronatus	male2	L	V	asct	824	830	834	827	831	836	823	829	834	828	832	836	0.921895
Eulemur coronatus	male3	L	V	desct-side	977	990	998	986	1000	1005	976	988	996	987	1001	1006	0.484868
Eulemur coronatus	male2	L	V	desct-rump	6826	6843	6848	6825	6841	6847	6835	6850	6857	6833	6849	6856	0.329767
Eulemur coronatus	female	L	V	asct	6741	6758	6772	6740	6760	6771	6752	6783	6802	6751	6785	6800	1.05288
Eulemur coronatus	female	L	V	desct-rump	6974	6993	7002	6969	6992	7000	6956	6980	6990	6957	6978	6988	0.916576
Eulemur coronatus	female	L	V	asct	18272	18309	18321	18271	18312	18319	18254	18278	18301	18253	18286	18299	0.424494
Eulemur coronatus	male1	L	V	asct	20997	21019	21030	21011	21027	21036	20996	21020	21027	21016	21029	21037	1.21712
Eulemur coronatus	male1	L	V	desct-rump	21637	21674	21684	21669	21706	21725	21664	21705	21728	21629	21675	21690	0.308362
Eulemur coronatus	male1	L	V	asct	8543	8564	8572	8543	8562	8572	8555	8577	8584	8556	8578	8583	0.994554
Eulemur coronatus	female	M	O	asct	12242	12276	12302	12238	12285	12299	12218	12249	12269	12216	12255	12268	0.246873
Eulemur coronatus	male2	M	O	desct-side	9887	9904	9921	9900	9930	9947	9885	9903	9919	9896	9927	9944	0.601954
Eulemur coronatus	male3	M	O	desct-side	16859	16883	16891	16874	16901	16915	16858	16885	16895	16876	16897	16917	0.57524
Eulemur coronatus	female	M	O	asct	17747	17783	17797	17744	17781	17794	17777	17806	17821	17767	17804	17818	0.540808
Eulemur coronatus	male2	M	O	desct-head	18982	19004	19019	18993	19024	19033	18975	19004	19010	18998	19018	19035	0.720066
Eulemur coronatus	male1	M	O	asct	1439	1459	1472	1437	1460	1469	1456	1473	1489	1455	1474	1487	0.766904
Eulemur coronatus	male1	M	O	asct	2075	2087	2096	2073	2086	2093	2086	2100	2112	2085	2098	2109	1.09802
Eulemur coronatus	male3	M	O	desct-head	2400	2420	2426	2402	2424	2432	2412	2435	2444	2415	2439	2448	0.325029
Eulemur coronatus	male2	M	O	desct-head	6503	6523	6536	6498	6526	6535	6485	6507	6522	6480	6504	6514	0.280788
Eulemur coronatus	male1	M	O	desct-head	9273	9290	9301	9270	9291	9299	9287	9302	9310	9283	9303	9312	0.683999
Eulemur coronatus	male1	M	O	asct	9372	9389	9403	9367	9391	9401	9361	9370	9391	9359	9373	9385	0.443411
Eulemur coronatus	female	M	O	desct-head	18686	18704	18713	18689	18706	18714	18703	18718	18730	18697	18717	18727	0.774489
Eulemur coronatus	female	M	O	asct	18872	18884	18899	18869	18885	18897	18884	18902	18917	18881	18904	18914	0.512543
Eulemur coronatus	male1	M	O	asct	1246	1260	1272	1243	1259	1268	1259	1272	1282	1255	1272	1281	1.17329
Eulemur coronatus	male1	M	O	desct-head	3463	3480	3488	3464	3478	3484	3474	3492	3506	3475	3493	3503	0.844692
Eulemur coronatus	male3	M	V	asct	581	594	602	580	596	601	593	602	609	591	603	607	0.423268
Eulemur coronatus	male2	M	V	desct-side	1015	1038	1043	992	1025	1029	1012	1037	1040	996	1028	1035	0.188722
Eulemur coronatus	male1	M	V	desct-side	4873	4897	4908	4888	4917	4927	4870	4895	4906	4892	4919	4930	0.815675
Eulemur coronatus	female	M	V	asct	14851	14881	14901	14850	14883	14898	14828	14858	14876	14827	14860	14874	0.603857
Eulemur coronatus	female	M	V	asct	16683	16707	16716	16681	16707	16714	16692	16720	16738	16689	16722	16735	0.72819
Eulemur coronatus	female	M	V	asct	17884	17925	17941	17883	17928	17939	17919	17952	17966	17917	17949	17963	0.741902
Eulemur coronatus	male1	M	V	asct	4587	4642	4655	4585	4639	4652	4632	4655	4675	4626	4659	4673	1.02253
Eulemur coronatus	male1	M	V	desct-rump	7762	7785	7807	7760	7786	7804	7740	7768	7779	7735	7764	7774	0.68971
Eulemur coronatus	male1	M	V	desct-side	8679	8712	8719	8689	8723	8736	8676	8710	8717	8699	8725	8740	0.356778
Eulemur coronatus	male2	M	V	desct-head	5712	5775	5784	5715	5774	5787	5761	5793	5804	5765	5792	5807	0.273975
Eulemur coronatus	female	M	V	desct-side	9273	9299	9319	9274	9302	9313	9293	9320	9347	9289	9323	9343	0.522624
Eulemur coronatus	male3	M	V	asct	10149	10190	10208	10148	10193	10207	10186	10216	10232	10185	10219	10229	0.343699
Eulemur coronatus	male2	M	V	asct	11636	11660	11676	11633	11655	11673	11620	11641	11651	11619	11639	11650	0.806446
Eulemur coronatus	male2	M	V	desct-rump	16690	16738	16751	16687	16737	16748	16643	16717	16724	16641	16709	16723	0.437908
Eulemur coronatus	female	M	V	desct-rump	18359	18421	18437	18409	18472	18483	18371	18442	18455	18385	18458	18468	0.336086
Eulemur coronatus	male2	M	V	desct-rump	24154	24212	24218	24157	24211	24226	24207	24234	24245	24209	24237	24254	0.485846
Eulemur coronatus	male3	M	V	asct	25180	25218	25238	25175	25215	25233	25153	25194	25208	25152	25187	25204	0.379244
Eulemur coronatus	female	M	V	desct-rump	25661	25694	25712	25657	25692	25709	25639	25669	25681	25637	25668	25680	0.420494
Eulemur coronatus	male2	S	O	asct	1716	1752	1780	1716	1766	1778	1696	1724	1746	1690	1726	1738	0.388286
Eulemur coronatus	male3	S	O	desct-head	2296	2312	2325	2294	2308	2322	2280	2300	2311	2276	2296	2308	0.725929
Eulemur coronatus	male2	S	O	desct-head	2636	2650	2658	2633	2646	2655	2612	2638	2649	2608	2638	2647	0.755213
Eulemur coronatus	male3	S	O	asct	5731	5758	5776	5729	5761	5772	5722	5740	5756	5719	5742	5753	0.478903
Eulemur coronatus	male1	S	O	desct-side	13929	13972	13981	13962	13989	14006	13940	13974	13985	13971	13992	14011	0.316103
Eulemur coronatus	male1	S	O	asct	14161	14182	14197	14159	14183	14195	14146	14166	14177	14144	14164	14175	1.37764
Eulemur coronatus	male1	S	O	asct	3862	3887	3896	3860	3892	3900	3886	3904	3920	3882	3907	3919	0.709706
Eulemur coronatus	male1	S	O	desct-head	4877	4902	4915	4870	4906	4913	4902	4922	4936	4901	4925	4934	0.595721
Eulemur coronatus	female	S	O	asct	7349	7372	7389	7345	7374	7386	7369	7390	7407	7365	7392	7403	0.800662
Eulemur coronatus	female	S	O	asct	7860	7889	7903	7857	7891	7902	7841	7871	7886	7838	7868	7883	0.672193
Eulemur coronatus	female	S	O	desct-head	12777	12817	12829	12778	12821	12833	12805	12837	12859	12815	12839	12855	0.456528
Eulemur coronatus	male2	S	O	asct	15037	15059	15072	15034	15062	15070	15019	15041	15055	15014	15042	15052	0.603259
Eulemur coronatus	male2	S	O	desct-head	15229	15257	15269	15227	15255	15266	15206	15237	15247	15204	15233	15245	0.53004
Eulemur coronatus	female	S	O	desct-side	15960	15999	16012	15998	16024	16044	15968	16006	16015	15995	16021	16040	0.346907
Eulemur coronatus	female	S	V	asct	3770	3782	3789	3767	3782	3787	3758	3772	3779	3754	3773	3777	0.474564
Eulemur coronatus	female	S	V	desct-side	4118	4137	4144	4136	4158	4166	4121	4135	4147	4131	4157	4163	0.351835
Eulemur coronatus	male3	S	V	asct	12770	12782	12793	12767	12785	12791	12780	12795	12805	12779	12798	12803	0.332278
Eulemur coronatus	male3	S	V	desct-side	12906	12935	12943	12931	12968	12973	12908	12932	12946	12930	12964	12972	0.282941
Eulemur coronatus	female	S	V	asct	14785	14801	14813	14785	14805	14812	14797	14818	14827	14796	14821	14826	0.339756
Eulemur coronatus	male1	S	V	desct-side	1430	1455	1463	1452	1477	1492	1440	1459	1467	1443	1470	1488	0.469987
Eulemur coronatus	male1	S	V	asct	2054	2085	2096	2052	2083	2092	2069	2107	2116	2067	2102	2113	0.446231
Eulemur coronatus	male1	S	V	desct-rump	7390	7407	7418	7394	7410	7421	7360	7394	7401	7372	7397	7404	0.5
Eulemur coronatus	female	S	V	asct	656	702	714	654	705	712	637	667	686	631	679	684	0.553
Eulemur coronatus	male2	S	V	asct	10376	10418	10434	10372	10421	10432	10323	10391	10410	10320	10397	10407	0.167145
Eulemur coronatus	male3	S	V	asct	11034	11063	11072	11033	11065	11074	11011	11040	11051	11009	11041	11050	0.308367
Eulemur coronatus	male1	S	V	desct-rump	3950	3966	3980	3946	3967	3977	3963	3977	3994	3957	3983	3991	0.6
Eulemur coronatus	male1	S	V	desct-rump	5735	5781	5789	5761	5832	5841	5737	5797	5809	5772	5818	5831	0.422093
Eulemur coronatus	male1	S	V	desct-rump	7068	7122	7147	7055	7139	7145	7045	7096	7112	7042	7092	7108	0.7
Eulemur coronatus	male1	S	V	desct-side	8234	8279	8288	8275	8311	8323	8237	8292	8304	8269	8304	8316	0.51023
Eulemur coronatus	male1	S	V	asct	9249	9276	9294	9243	9279	9293	9224	9257	9270	9220	9259	9268	0.740294
Eulemur rubriventer	female2	L	V	desct-side	204	216	230	203	215	228	213	232	242	212	230	239	0.317854
Eulemur rubriventer	female2	L	V	asct	757	773	785	760	773	784	773	792	806	772	791	805	0.661498
Eulemur rubriventer	female2	L	V	desct-rump	920	930	935	920	932	942	930	946	963	929	949	961	0.311493
Eulemur rubriventer	female2	L	V	asct	1609	1623	1633	1606	1622	1632	1622	1642	1655	1621	1642	1654	0.392699
Eulemur rubriventer	female2	L	V	asct	1982	1995	2002	1986	2005	2014	1983	1996	2003	1984	2004	2013	0.67367
Eulemur rubriventer	female2	L	V	desct-rump	2340	2358	2363	2338	2360	2371	2356	2373	2387	2355	2379	2386	0.562615
Eulemur rubriventer	female2	L	V	desct-rump	4454	4463	4468	4454	4466	4471	4462	4469	4479	4461	4472	4477	0.450319
Eulemur rubriventer	male2	L	V	asct	619	626	631	621	628	631	616	622	624	616	622	626	0.905801
Eulemur rubriventer	male2	L	V	asct	1259	1267	1272	1257	1266	1270	1265	1275	1279	1262	1272	1278	0.698788
Eulemur rubriventer	male2	L	V	desct-rump	1572	1582	1585	1573	1583	1586	1567	1574	1577	1568	1575	1580	0.733713
Eulemur rubriventer	male2	L	V	desct-rump	724	733	738	725	735	739	731	740	745	731	741	745	0.989548
Eulemur rubriventer	male2	L	V	asct	973	986	990	974	985	989	980	990	998	984	992	998	0.793656
Eulemur rubriventer	male2	L	V	asct	365	378	387	366	379	389	356	371	375	357	373	377	0.492436
Eulemur rubriventer	male2	L	V	asct	387	398	406	389	399	407	375	389	395	377	390	394
Eulemur rubriventer	male2	L	V	desct-rump	598	604	611	597	605	610	603	611	616	603	612	617	0.533042
Eulemur rubriventer	female2	L	O	asct	946	975	990	944	976	988	924	952	973	922	955	971	0.271081
Eulemur rubriventer	female2	L	O	desct-head	1071	1087	1097	1081	1095	1114	1066	1085	1093	1087	1105	1110	0.549438
Eulemur rubriventer	female2	L	O	asct	3933	3956	3970	3930	3955	3968	3952	3975	3993	3950	3971	3989	0.582883
Eulemur rubriventer	male2	L	O	desct-head	497	506	515	499	508	517	503	517	522	506	519	524	0.895819
Eulemur rubriventer	male2	L	O	desct-head	1141	1145	1150	1140	1147	1152	1135	1140	1144	1135	1140	1145	1.20565
Eulemur rubriventer	male2	L	O	desct-head	1150	1165	1172	1152	1166	1173	1144	1155	1160	1145	1157	1162
Eulemur rubriventer	male2	L	O	asct	1879	1884	1893	1877	1883	1891	1873	1878	1884	1871	1877	1882	0.931782
Eulemur rubriventer	male2	L	O	desct-head	2220	2231	2236	2222	2223	2239	2216	2220	2227	2218	2222	2229	0.13606
Eulemur rubriventer	male2	L	O	asct	2755	2767	2781	2752	2766	2778	2746	2755	2766	2743	2753	2763	0.531123
Eulemur rubriventer	male1	L	O	asct	4517	4551	4565	4516	4553	4563	4505	4535	4543	4503	4534	4541	0.592804
Eulemur rubriventer	female1	L	O	desct-side	7472	7507	7516	7507	7521	7529	7473	7507	7515	7497	7520	7527	0.234226
Eulemur rubriventer	female1	L	O	asct	3786	3825	3838	3784	3826	3836	3818	3842	3860	3816	3843	3858	0.455408
Eulemur rubriventer	female2	M	O	asct	697	714	729	691	717	731	681	703	717	679	697	711	0.369935
Eulemur rubriventer	female2	M	O	asct	1126	1150	1163	1121	1148	1160	1107	1132	1145	1104	1129	1140	0.450221
Eulemur rubriventer	female2	M	O	desct-side	1864	1876	1885	1880	1905	1912	1860	1876	1887	1868	1889	1897	0.319423
Eulemur rubriventer	female2	M	O	desct-side	2220	2276	2281	2240	2288	2297	2219	2246	2273	2241	2278	2289	0.184181
Eulemur rubriventer	male2	M	O	desct-head	1119	1142	1154	1114	1143	1155	1104	1122	1132	1101	1125	1136	0.496497
Eulemur rubriventer	male2	M	O	asct	1300	1318	1330	1296	1319	1328	1287	1301	1317	1285	1299	1314	0.712222
Eulemur rubriventer	male2	M	O	desct-head	1841	1867	1876	1846	1868	1878	1827	1850	1861	1830	1852	1863	0.405108
Eulemur rubriventer	male2	M	O	asct	2663	2674	2686	2656	2675	2685	2647	2660	2674	2641	2662	2671	1.11911
Eulemur rubriventer	female1	M	O	desct-head	3405	3420	3431	3407	3422	3434	3416	3437	3444	3417	3439	3446	0.384262
Eulemur rubriventer	female1	M	O	desct-head	6492	6511	6525	6494	6507	6520	6506	6529	6538	6507	6527	6539	0.371079
Eulemur rubriventer	female1	M	O	asct	7745	7762	7775	7742	7763	7772	7724	7747	7760	7721	7748	7757	0.612671
Eulemur rubriventer	male1	M	O	asct	527	550	564	521	551	563	545	568	583	543	569	582	0.632484
Eulemur rubriventer	male1	M	O	asct	1420	1436	1452	1414	1439	1450	1404	1422	1434	1401	1420	1433	0.7995
Eulemur rubriventer	male1	M	O	desct-head	3568	3597	3607	3568	3591	3603	3588	3616	3625	3583	3612	3623	0.601151
Eulemur rubriventer	female1	M	O	desct-head	4445	4471	4481	4440	4469	4478	4429	4453	4462	4421	4451	4462	0.480141
Eulemur rubriventer	female1	M	O	asct	7768	7786	7806	7764	7787	7803	7752	7771	7784	7749	7770	7781	0.911623
Eulemur rubriventer	male1	M	V	desct-rump	1306	1323	1332	1304	1322	1331	1322	1332	1342	1320	1331	1341	0.516536
Eulemur rubriventer	female1	M	V	desct-rump	1953	1975	1984	1951	1974	1982	1935	1962	1973	1934	1961	1971	0.549224
Eulemur rubriventer	female1	M	V	asct	2373	2390	2402	2371	2391	2398	2352	2378	2387	2350	2380	2388	0.887079
Eulemur rubriventer	female1	M	V	desct-rump	2826	2849	2855	2824	2846	2853	2849	2865	2874	2845	2863	2872	0.605598
Eulemur rubriventer	female1	M	V	asct	3004	3022	3032	3001	3023	3032	3019	3035	3047	3019	3034	3046	0.714918
Eulemur rubriventer	male1	M	V	asct	4328	4355	4368	4327	4357	4368	4345	4373	4386	4346	4376	4385	0.592429
Eulemur rubriventer	female2	M	V	asct	3207	3234	3245	3204	3231	3244	3190	3212	3224	3188	3210	3222	0.27096
Eulemur rubriventer	female2	M	V	asct	3245	3277	3291	3244	3273	3289	3224	3250	3264	3222	3248	3265
Eulemur rubriventer	female2	M	V	asct	5284	5313	5324	5282	5307	5320	5304	5331	5350	5303	5333	5347	0.561751
Eulemur rubriventer	female2	M	V	desct-rump	7784	7798	7812	7779	7796	7810	7795	7817	7832	7794	7815	7830	0.529603
Eulemur rubriventer	male1	M	V	desct-rump	4714	4742	4751	4717	4745	4756	4734	4760	4775	4740	4764	4777	0.27857
Eulemur rubriventer	female1	M	V	desct-rump	20699	20740	20751	20701	20745	20756	20737	20755	20767	20735	20759	20769	0.339004
Eulemur rubriventer	male2	M	V	desct-side	5548	5572	5578	5551	5572	5582	5562	5584	5591	5568	5590	5600	0.434142
Eulemur rubriventer	female2	M	V	asct	2962	2987	3002	2963	2984	2999	2954	2970	2979	2953	2967	2976	0.705303
Eulemur rubriventer	female2	M	V	desct-side	6867	6921	6933	6875	6920	6934	6849	6904	6912	6852	6896	6914	0.116384
Eulemur rubriventer	female2	M	V	asct	8438	8459	8467	8436	8457	8463	8450	8471	8482	8447	8469	8479	0.474178
Eulemur rubriventer	male2	S	O	asct	1613	1640	1655	1612	1639	1656	1636	1672	1686	1634	1670	1684	0.466922
Eulemur rubriventer	male2	S	O	desct-head	2329	2387	2403	2335	2382	2408	2308	2358	2372	2311	2350	2365	0.340402
Eulemur rubriventer	male2	S	O	asct	4836	4856	4867	4834	4857	4864	4851	4876	4890	4849	4869	4883	0.50567
Eulemur rubriventer	male2	S	O	desct-head	5095	5137	5147	5096	5137	5149	5075	5107	5119	5077	5107	5120	0.607327
Eulemur rubriventer	male2	S	O	asct	5901	5933	5960	5895	5943	5957	5877	5904	5929	5874	5907	5922	0.561244
Eulemur rubriventer	male2	S	O	desct-side	6990	7027	7037	6997	7025	7032	7007	7037	7044	7018	7045	7055	0.47523
Eulemur rubriventer	female1	S	O	asct	5476	5499	5515	5469	5501	5513	5455	5478	5497	5452	5480	5495	0.278804
Eulemur rubriventer	female1	S	O	desct-head	5962	5980	5990	5967	5982	5991	5976	5995	6003	5979	5996	6005	0.697978
Eulemur rubriventer	female1	S	O	desct-head	7135	7147	7157	7137	7148	7158	7144	7160	7172	7145	7162	7174	0.666781
Eulemur rubriventer	female2	S	O	asct	11198	11214	11226	11197	11215	11224	11207	11228	11242	11206	11226	11240	0.498353
Eulemur rubriventer	male1	S	O	desct-head	933	960	968	934	968	975	949	979	993	950	981	994	0.976674
Eulemur rubriventer	male1	S	O	desct-head	1465	1506	1519	1466	1499	1517	1493	1530	1544	1486	1527	1542	0.504689
Eulemur rubriventer	male1	S	O	asct	3113	3175	3188	3110	3156	3179	3150	3201	3211	3126	3191	3206	0.295556
Eulemur rubriventer	female1	S	O	asct	3971	4000	4016	3967	3996	4010	3993	4025	4040	3990	4020	4035	0.287091
Eulemur rubriventer	female1	S	O	desct-head	5847	5880	5887	5853	5889	5904	5817	5855	5863	5819	5860	5874	0.34309
Eulemur rubriventer	female1	S	O	asct	6329	6375	6390	6322	6373	6383	6254	6349	6368	6250	6354	6366	0.351031
Eulemur rubriventer	male2	S	V	asct	835	859	872	833	856	870	851	886	898	848	884	896	0.725148
Eulemur rubriventer	male2	S	V	desct-rump	3003	3043	3062	3005	3053	3063	3021	3063	3070	3023	3064	3071	0.520128
Eulemur rubriventer	male2	S	V	asct	3521	3558	3570	3519	3561	3571	3446	3574	3589	3543	3580	3587	0.734311
Eulemur rubriventer	male2	S	V	desct-rump	4535	4578	4587	4546	4581	4591	4507	4551	4562	4512	4555	4564	0.218502
Eulemur rubriventer	male2	S	V	asct	4872	4898	4904	4870	4895	4905	4889	4909	4922	4885	4913	4921	0.719418
Eulemur rubriventer	male2	S	V	asct	8546	8577	8590	8542	8573	8590	8568	8600	8614	8565	8608	8613	0.618791
Eulemur rubriventer	female2	S	V	desct-rump	4752	4799	4807	4754	4791	4806	4789	4809	4824	4785	4807	4823	0.16244
Eulemur rubriventer	female2	S	V	asct	6872	6888	6899	6870	6887	6898	6882	6905	6921	6882	6907	6920	0.364321
Eulemur rubriventer	female2	S	V	asct	8214	8251	8263	8211	8243	8260	8117	8220	8233	8115	8216	8228	0.301835
Eulemur rubriventer	female2	S	V	desct-rump	8480	8517	8528	8490	8518	8530	8512	8531	8542	8517	8535	8546	0.176469
Eulemur rubriventer	male1	S	V	desct-rump	4180	4224	4239	4181	4233	4251	4209	4275	4281	4216	4263	4278	0.220234
Eulemur rubriventer	female1	S	V	desct-rump	12984	13018	13034	12987	13029	13043	13013	13051	13062	13016	13048	13065	0.503176
Eulemur rubriventer	female1	S	V	asct	9460	9491	9508	9459	9497	9507	9485	9511	9527	9484	9517	9526	0.503741
Eulemur rubriventer	male1	S	V	asct	18505	18544	18555	18500	18542	18554	18481	18512	18530	18479	18511	18531	0.397387

## Sheet: BodyLength_forSpeed
Species	indiv	mean_head_body_length_m
Nycticebus pygmaeus	1	0.250398
Nycticebus pygmaeus	2	0.250398
Nycticebus pygmaeus	3	0.250398
Nycticebus pygmaeus	4	0.250398
Hapalemur occidentalis	male	0.218867
Hapalemur griseus	female	0.31001
Eulemur rubriventer	female1	0.354872
Eulemur rubriventer	female2	0.354872
Eulemur rubriventer	male1	0.428998
Eulemur rubriventer	male2	0.428998
Eulemur coronatus	female	0.448745
Eulemur coronatus	male1	0.362145
Eulemur coronatus	male2	0.362145
Eulemur coronatus	male3	0.362145
Eulemur mongoz	female	0.490677
Eulemur mongoz	male1	0.389205
Eulemur mongoz	male2	0.389205
Callicebus cupreus	female	0.34265
Callicebus cupreus	male	0.305147
Saimiri boliviensis	female	0.282165
Saimiri boliviensis	male	0.3326
Saimiri boliviensis	male1	0.3326
Saimiri boliviensis	male2	0.3326
Aotus lemurinus	female	0.29342
Aotus lemurinus	male	0.38063
Saguinus imperator	female	0.213367
Saguinus imperator	male	0.241705
Saguinus oedipus	female	0.248065
Saguinus oedipus	male	0.29183
Tupaia belangeri	female1	0.0746511
Tupaia belangeri	female2	0.0746511
Tupaia belangeri	female3	0.0746511
Dryomys nitedula	female	0.07952
Dryomys nitedula	male	0.0906667
Graphiurus murinus	female	0.0761267
Graphiurus murinus	male	0.100073
Typhlomys chapensis	male1	0.09063
Typhlomys chapensis	male2	0.09063
Procyon lotor	female	0.70724
Procyon lotor	male1	0.534638
Procyon lotor	male2	0.534638
Procyon lotor	male3	0.534638
Nasua nasua	female1	0.486385
Nasua nasua	female2	0.486385
Nasua nasua	male1	0.58253
Nasua nasua	male2	0.58253
Potos flavus	female	0.534167
Caluromys philander	male1	0.31369
Caluromys philander	male2	0.31369
Trichosurus vulpecula	female	0.48161
Trichosurus vulpecula	male	0.44451
Petaurus breviceps	1	0.1527
Petaurus breviceps	2	0.1527
Petaurus breviceps	3	0.1527
Petaurus breviceps	4	0.1527
