# Supplementary material for: Kinematics and morphological correlates of descent strategies in arboreal mammals suggest early upright postures in euprimates
Source: eLife. 2026 Feb 17;14:RP108268. doi: 10.7554/eLife.108268 (PMC12912726; doi:10.7554/eLife.108268)
Supplement: Supplementary file 1. — Species with an* are nocturnal. PZP = Parc Zoologique de Paris, France. PZBM=Parc Zoologique et Botanique de Mulhouse, France. [file elife-108268-supp1.xlsx]

## Sheet: Feuil1
	Family	Subfamily	Species	Housing location	Observation period	Sample size	Year of birth
Strepsirrhines primates	Lorisidae	Lorisinae	Xanthonycticebus pygmaeus*	Nowe Zoo Poznan, Poland	2013-03-01	4 females	unknown
	Lemuridae		Hapalemur occidentalis	Parc Zoologique de Paris (PZP), France	2017-04-01	1 male	2014
			Hapalemur griseus	Parc Zoologique et Botanique de Mulhouse (PZBM), France	2016-09-01	1 female	2006
			Eulemur rubriventer	PZBM	2016-09-01	2 females, 2 males	1991, 2010 & 2008, 2009
			Eulemur coronatus	PZBM	2016-09-01	1 female, 3 males	1999 & 2005, 2015, 2015
			Eulemur mongoz	PZBM	2016-09-01	1 female	1987
				PZP	2017-04-01	2 males	1996, 2001
Platyrrhines primates	Pitheciidae	Callicebinae	Plecturocebus cupreus	PZP	2017-04-01	1 female, 1 male	2007 & 2010
	Cebidae	Saimirinae	Saimiri boliviensis boliviensis	PZBM	2016-01-01	2 females, 2 males	2005, 2010 & 2011, 2015
		Aotinae	Aotus lemurinus griseimembra*	Spaycific'Zoo, France	2017-09-01	1 female, 1 male	2010 & 2009
		Callitrichinae	Saguinus imperator	PZBM	2016-09-01	2 females, 2 males	2010, 2013 & 2014, 2014
			Saguinus oedipus	Spaycific'Zoo, France	2017-09-01	1 female, 1 male	2016 & 2015
Scandentians	Tupaiidae		Tupaia belangeri	Moscow Zoo, Russia	2017-07-01	3 females	unknown
Rodents	Gliridae	Leithiinae	Dryomys nitedula*	University of Thessaloniki, Greece - wildcaught	2017-07-01	1 female, 1 male	unknown
		Graphiurinae	Graphiurus murinus*	Moscow Zoo, Russia	2017-07-01	1 female, 1 male	unknown
	Platacanthomyidae		Typhlomys chapensis*	Moscow Zoo, Russia	2017-07-01	2 males	unknown
Carnivorans	Procyonidae		Procyon lotor	Spaycific'Zoo, France	2017-09-01	1 female, 3 males	2005 & 2007, 2012, 2012
			Nasua nasua	Spaycific'Zoo, France	2017-09-01	2 females, 2 males	unknown
			Potos flavus*	Spaycific'Zoo, France	2017-09-01	1 female	unknown
Marsupials	Phalangeridae	Caluromyinae	Caluromys philander	Laboratoire d'écologie générale de Brunoy, France	1993-03-01	2 males	1990, 1991
			Trichosurus vulpecula*	Spaycific'Zoo, France	2017-09-01	1 female, 1 male	unknown
	Petauridae		Petaurus breviceps*	Spaycific'Zoo, France	2017-09-01	2 females, 2 males	2010, 2014 & 2012, 2014
