# Supplementary material for: Kinematics and morphological correlates of descent strategies in arboreal mammals suggest early upright postures in euprimates
Source: eLife. 2026 Feb 17;14:RP108268. doi: 10.7554/eLife.108268 (PMC12912726; doi:10.7554/eLife.108268)
Supplement: Supplementary file 2. — See Supplementary file 3 for the details of ECV measurement conducted in this study. [file elife-108268-supp2.xlsx]

## Sheet: Feuil1
Extant species
	Species	Mean body mass (g)	Reference for body mass		ECV (mL)	Calculated EQ		Reference for ECV
Strepsirrhines	Xanthonycticebus pygmaeus	362.5	(Fleagle, 2013)		7.23	1.6484		Powell et al., 2017
	Hapalemur occidentalis	1017	Fleagle 2013		13.75	1.4522		Powell et al. 2017
	Hapalemur griseus	709	Fleagle 2013		13.78	1.9048		Powell et al. 2017
	Eulemur rubriventer	1960	Fleagle 2013		23.91	1.5478		Powell et al. 2017
	Eulemur coronatus	1180	Fleagle 2013		19.78	1.8697		Powell et al. 2017
	Eulemur mongoz	1212.5	Fleagle 2013		18.89	1.7498		Powell et al. 2017
Platyrrhines	Plecturocebus cupreus	1070	Fleagle 2013		17.44	1.7734		Powell et al. 2017
	Saimiri boliviensis boliviensis	871.5	Fleagle 2013		21.52	2.5502		Powell et al. 2017
	Aotus lemurinus griseimembra	966	Fleagle 2013		16.07	1.7636		Powell et al. 2017
	Saguinus imperator	474.5	Fleagle 2013		10.7	1.9956		Powell et al. 2017
	Saguinus oedipus	411	Fleagle 2013		9.7	2.0138		Powell et al. 2017
Scandentia	Tupaia belangeri	160	animaldiversity.org (Myers et al., 2021)		2.15	0.9023		This study
Rodents	Dryomys nitedula	26	animaldiversity.org		0.58	0.9441		This study
	Graphiurus murinus	28.5	animaldiversity.org		0.46	0.6992		This study
	Typhlomys chapensis	16.93	(Cheng et al., 2017)		0.4	0.8967		This study
Carnivorans	Procyon lotor	6000	animaldiversity.org		40.04	1.1250		Finarelli, 2006
	Nasua nasua	4500	animaldiversity.org		29.96	1.1609		Finarelli et al. 2006
	Potos flavus	3300	animaldiversity.org		25.53	1.1205		Finarelli et al. 2006
Marsupials	Caluromys philander	265	animaldiversity.org		3.5	1.0081		Ashwell, 2008
	Trichosurus vulpecula	2850	animaldiversity.org		11	0.5386		Ashwell et al. 2008
	Petaurus breviceps	110	animaldiversity.org		1.3	0.7215		This study
Extinct species
	Species	Mean body mass (g)	Mean EQ	Estimated age (MY)			Reference for EQ, body mass and pictures for body lengths measured
Adapiformes	Darwinius masillae	660	NA	47			Franzen et al., 2009
	Europolemur kelleri	1485	NA	45			Koenigswald, 1979
	Notharctus tenebrosus	4947	0.26	45			Harrington et al., 2016
	Adapis parisiensis	1544	0.56	35			Ramdarshan and Orliac, 2016
Omomyiformes	Archicebus achilles	25	NA	55			Ni et al., 2013; Dagosto et al., 2018
	Microchoerus erinaceus	642	0.53	35			Ramdarshan and Orliac, 2016
	Tetonius homunculus	113	0.7	50			Ramdarshan and Orliac, 2016
Plesiadapiformes	Plesiadapis tricuspidens	2039	0.26	60			Orliac et al., 2014
	Plesiadapis cookei	2200	0.31	60			Silcox et al., 2009; Bertrand and Silcox, 2016
	Plesiadapis insignis	783	NA	60			Boyer, 2009
	Carpolestes simpsoni	100	NA	58			Silcox et al., 2017
	Ignacius graybullianus	375	0.48	58			Silcox et al., 2009; Harrington et al., 2016
Rodent	Ischyromys typus	1342.23	0.47	30			Bertrand and Silcox, 2016
