# Supplementary material for: Kinematics and morphological correlates of descent strategies in arboreal mammals suggest early upright postures in euprimates
Source: eLife. 2026 Feb 17;14:RP108268. doi: 10.7554/eLife.108268 (PMC12912726; doi:10.7554/eLife.108268)
Supplement: Supplementary file 3. — Specimens are from the anatomical collections of the Museum für Naturkunde of Berlin, Germany. We used Chia seeds, with a calculated reference of 1g=1.22 ml. We calculated the encephalization quotient (EQ) using a reference brain volumic mass of 1.036 g.cm-3 (Ebinger, 1974) and the following formula (Boddy et al., 2012): EQ=(1.036×ECV)/(0.056×(BodyMass)^0.746) [file elife-108268-supp3.xlsx]

## Sheet: Feuil1
Species	Specimen number	Calculated ECV (ml)	Mean ECV (ml)	STD ECV
Tupaia belangeri	ZMB_Mam_90819	2.2448	2.15126667	0.14140075
Tupaia belangeri	ZMB_Mam_90780	1.9886
Tupaia belangeri	ZMB_Mam_90781	2.2204
Dryomys nitedula	ZMB_Mam_I1062	0.5978	0.57746667	0.01863581
Dryomys nitedula	ZMB_Mam_I1065	0.5612
Dryomys nitedula	ZMB_Mam_I1085	0.5734
Graphiurus murinus	N.A.	0.5368	0.45953333	0.07937817
Graphiurus murinus	ZMB_Mam_20339	0.3782
Graphiurus murinus	ZMB_Mam_45008	0.4636
Typhlomys cinereus	ZMB_Mam_16777	0.4026	0.4026	NA
Petaurus breviceps	ZMB_Mam_86756	1.403	1.2993	0.14665395
Petaurus breviceps	ZMB_Mam_3471	1.1956
