# Supplementary material for: Kinematics and morphological correlates of descent strategies in arboreal mammals suggest early upright postures in euprimates
Source: eLife. 2026 Feb 17;14:RP108268. doi: 10.7554/eLife.108268 (PMC12912726; doi:10.7554/eLife.108268)
Supplement: Supplementary file 4. — See Supplementary file 2 for the associated mean body masses, mean encephalization quotient (EQ), and references from where we extracted the photographs used to measure the postcranial lengths. NA = not applicable [file elife-108268-supp4.xlsx]

## Sheet: Feuil1
Species	% Tail to body length	% Forelimb to body length	% Hindlimb to body length	Intermembral index	% Hand to forelimb length	% Foot to hindlimb length	% Pollex to hand length	% Hallux to foot length
Archicebus achilles	NA	NA	NA	NA	NA	59.65	NA	50
Microchoerus erinaceus	NA	NA	NA	NA	NA	NA	NA	NA
Tetonius homunculus	NA	NA	NA	NA	NA	NA	NA	NA
Adapis parisiensis	NA	NA	NA	NA	NA	NA	NA	NA
Darwinius masillae	131.71	49.59	80.89	59.40	54.43	49.62	51.16	46.97
Europolemur kelleri	NA	NA	NA	NA	NA	50.29	NA	40.23
Notharctus tenebrosus	NA	NA	NA	NA	NA	NA	NA	NA
Plesiadapis cookei	107.69	54.62	64.62	95.54	42	60.51	NA	NA
Plesiadapis insignis	68.38	54.27	59.83	92.47	47.67	50.54	NA	34.04
Plesiadapis tricuspidens	NA	NA	NA	NA	NA	NA	NA	NA
Carpolestes simpsoni	NA	50.36	63.31	78.33	48.94	46.67	NA	39.29
Ignacius graybullianus	NA	NA	NA	NA	NA	NA	NA	NA
Ischyromys typus	NA	NA	NA	NA	NA	NA	NA	NA
